# Supplementary material
Source: publisher figshare collection journal article supplement (https://tandf.figshare.com/articles/dataset/_/16896971)
Supplement: Supplementary file 1 [file 1]

**Overlapping functions of Rbbp4 and Rbbp7 in regulating cell proliferation and histone H3.3 deposition during mouse preimplantation development**

Lieying Xiao<sup>1,#</sup>, Yanna Dang<sup>1,#</sup>, Bingjie Hu<sup>1</sup>, Lei Luo<sup>1</sup>, Panpan Zhao<sup>1</sup>, Shaohua Wang<sup>1</sup> and Kun Zhang<sup>1,2</sup>

<sup>1</sup>Laboratory of Mammalian Molecular Embryology, College of Animal Sciences, Assisted Reproduction Unit, Department of Obstetrics and Gynecology, Sir Run Run Shaw Hospital, School of Medicine, Zhejiang University, Hangzhou, Zhejiang 310058, China

## Figure Legends

### **Figure S1 Functional redundancy for Rbbp4 and 7 in supporting mouse preimplantation development.**

A. Representative pictures of NC and R4KD, R7KD, and coKD embryos at E3.5 and E4.5. B and C. Outgrowth analysis showed significant reduction in percent outgrowth in KD groups (three replicates). Asterisks refer to significant differences ( $P < 0.05$ ).

**Figure S2 RNA-seq analysis.** A-D. Scatter plots showing correlation of two biological replicates of RNA-seq samples for NC, R4KD, R7KD, and coKD embryos at morula stage. E. Gene ontology analysis of up-regulated genes induced in coKD embryos compared with NC embryos.

**Figure S3 Effects of individual knockdown of Rbbp4 or 7 in cell cycle progression and intercellular junctions in preimplantation embryos.** A. Immunostaining against Phosphorylation of S10 on histone H3 (pH3S10), an established marker for G2/M phase, in NC, R4KD, and R7KD blastocyst. B. Immunostaining analysis of Phosphorylation of Rb (pRb), a marker for G1/S checkpoint, in NC, R4KD, and R7KD blastocyst. C. The number of intercellular junctions is reduced obviously in coKD relative to NC embryos. Scale bar = 50  $\mu$ M.

**Figure S4 Effects of individual knockdown of Rbbp4 or 7 in cell apoptosis and genome stability in preimplantation embryos.**

A. Cell apoptosis analysis of NC, R4KD, and R7KD blastocyst. B. Representative pictures of immunostaining against Histone H2AX phosphorylation (rH2AX), a marker for DNA damage, in NC, R4KD, and R7KD blastocyst.

**Figure S5 Effects of individual knockdown of Rbbp4 or 7 in lineage development in preimplantation embryos.**

A. Immunostaining analysis of Oct4, a marker of trophectoderm, and Gata6, a marker for primitive endoderm, in NC, R4KD, and R7KD blastocyst at E4.25. B. Immunostaining analysis of Sox17, a marker for primitive endoderm, in NC, R4KD, and R7KD blastocyst at E4.25.

**Figure S6 Effects of Rbbp4/7 depletion on histone H3 lysine 27 acetylation and (H3K27ac) and histone H4 lysine 16 acetylation (H4K16ac).** A. Immunostaining analysis of H4K16ac in NC and coKD morula. B. Immunostaining analysis of H3K27ac in NC and coKD morula. C. Immunostaining analysis of H3K27ac in NC, R4KD, and R7KD blastocysts. Scale bar = 50  $\mu$ M

**Figure S7 Effects of Rbbp4/7 depletion on histone H3 lysine 4 tri-methylation (H3K4me3) and histone H3 lysine 9 di-methylation (H3K9me2).** A and B. Immunostaining analysis of H3K4me3 (A) and H3K9me2 (B), hallmarks for active and repressive transcription, respectively. Scale bar = 50  $\mu$ M.

**Figure S8 Effects of Rbbp4/7 depletion on histone variant H3.3.** A and B. Immunostaining analysis of H.3 in NC, R4KD, and R7KD morula (A) and blastocysts (B). Scale bar = 50  $\mu$ M

**Figure S9 Reproducibility of H3K27ac ChIP-seq experiment.** A and B. Scatter plots showing correlation of two biological replicates of H3K27ac ChIP-seq samples for NC and coKD embryos at morula stage.

**Table S1: siRNA information**

**Table S2: Antibody information**

**Table S3. Differentially expressed genes identified by RNA-seq between Rbbp4 depleted group and control group in mice (ranked by adjusted p (padj) value). Threshold:  $\text{padj} \leq 0.05$  &  $\text{FoldChange} \geq 1.5$  or  $\text{FoldChange} \leq -1.5$ .**

**Table S4. Differentially expressed genes identified by RNA-seq between Rbbp7 depleted group and control group in mice (ranked by adjusted p (padj) value). Threshold:  $\text{padj} \leq 0.05$  &  $\text{FoldChange} \geq 1.5$  or  $\text{FoldChange} \leq -1.5$ .**

**Table S5. Differentially expressed genes identified by RNA-seq between both RBBP4 and 7 depleted group and control group in mice (ranked by adjusted p (padj) value). Threshold:  $\text{padj} \leq 0.05$  &  $\text{FoldChange} \geq 1.5$  or  $\text{FoldChange} \leq -1.5$ .**

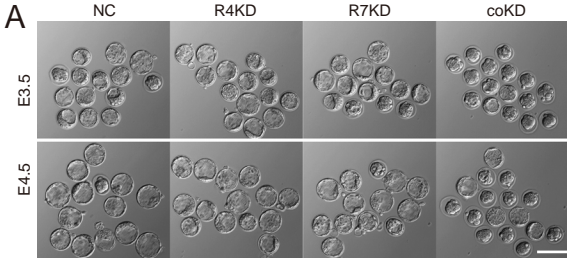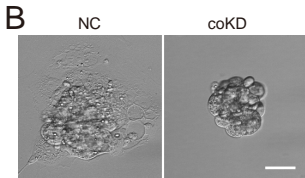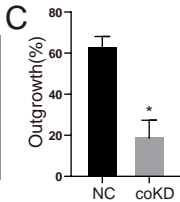

A

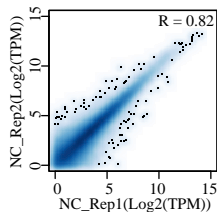

B

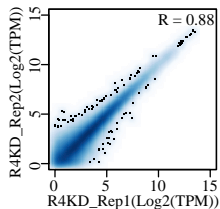

C

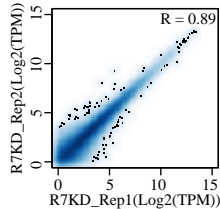

D

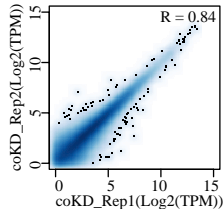

E

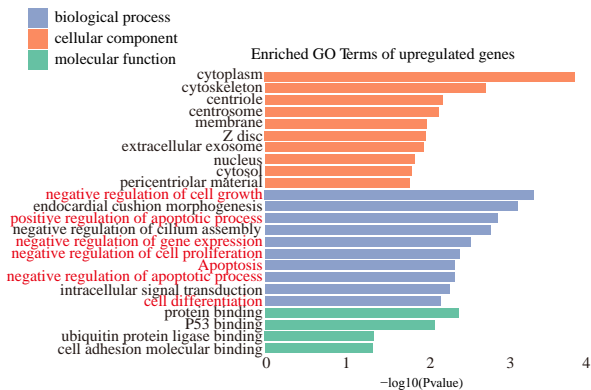

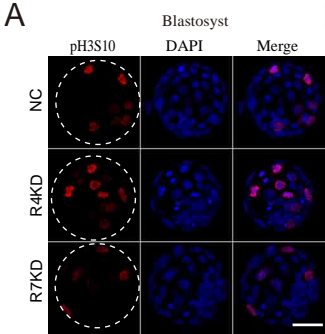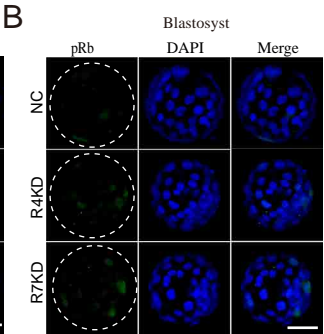

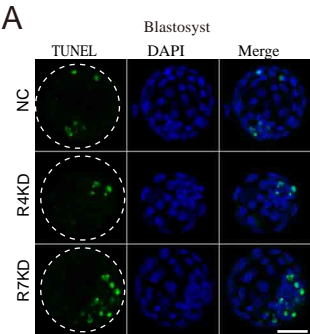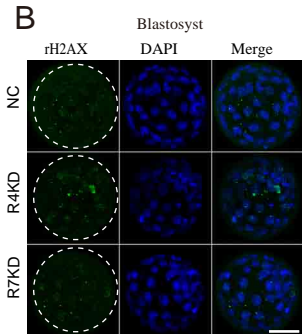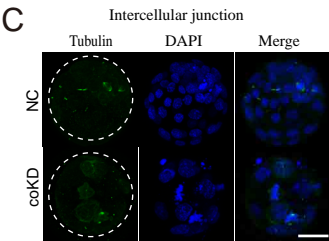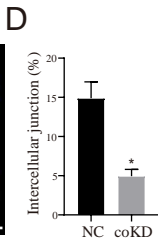

**A**

Oct4

DAPI

Merge

NC

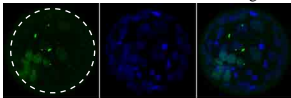

R4KD

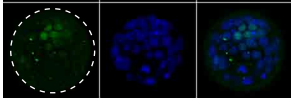

R7KD

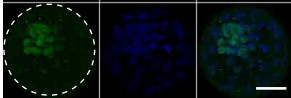**B**

Sox17

DAPI

Merge

NC

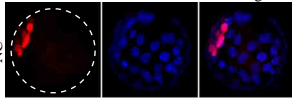

R4KD

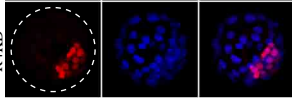

R7KD

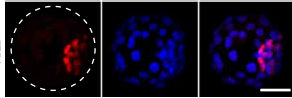



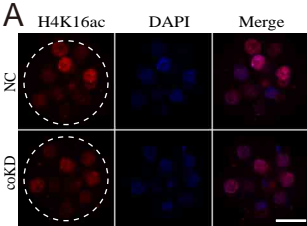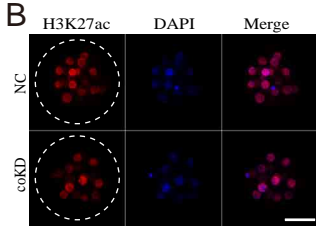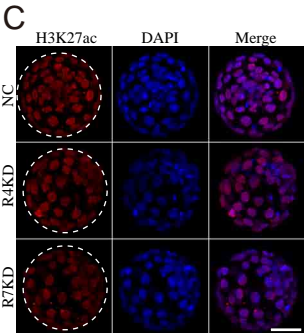

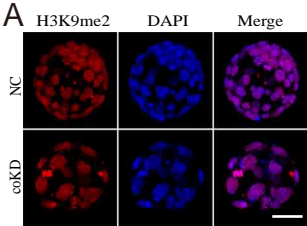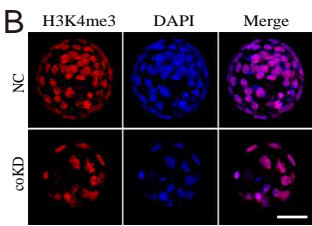

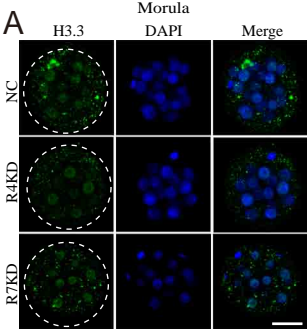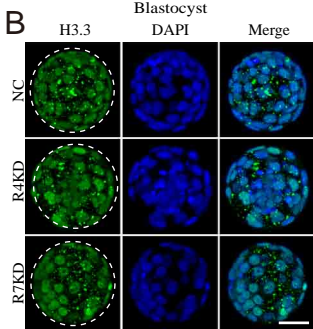

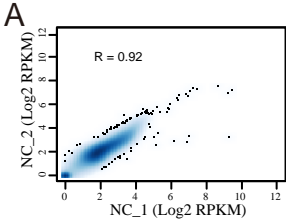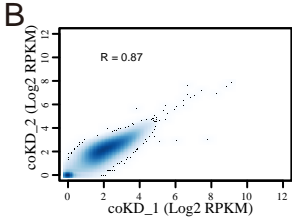

**Table S1 : siRNA information**

| Name           | Species | Sequences (5' to 3')                                              |
|----------------|---------|-------------------------------------------------------------------|
| Rbbp4-Mus-526  | Mouse   | Sense: CCCGGUACAUGCCUCAGAATT<br>Antisense: UUCUGAGGCAUGUACCGGGTT  |
| Rbbp4-Mus-609  | Mouse   | Sense: CCUUCUAAACCAGACCCUUTT<br>Antisense: AAGGGUCUGGUUUAGAAGGTT  |
| Rbbp4-Mus-901  | Mouse   | Sense: GGGACACUCGUUCAACAATT<br>Antisense: UUGUUUGAACGAGUGUCCCTT   |
| Rbbp7-Mus-419  | Mouse   | Sense: GGUUAUGACCCAUGCUCUUTT<br>Antisense: AAGAGCAUGGGUCAUAAACCTT |
| Rbbp7-Mus-888  | Mouse   | Sense: GGGCAUCUCCUGAGUGCAUTT<br>Antisense: AUGCACUCAGGAGAUGCCCTT  |
| Rbbp7-Mus-1028 | Mouse   | Sense: GCUGCAUGAGUCCUUGUUUTT<br>Antisense: AAACAAGGACUCAUGCAGCTT  |

**Table S2 : Antibody information**

| Name                       | Host   | Company                   | Catalog Number | Application |
|----------------------------|--------|---------------------------|----------------|-------------|
| RBBP4                      | Rabbit | Abcam                     | ab79416        | IF (1:200)  |
| RBBP7                      | Rabbit | Cell Signaling Technology | #6882          | IF (1:200)  |
| Phospho-Histone H3 (Ser10) | Rabbit | Cell Signaling Technology | #3377          | IF (1:200)  |
| Phospho-Rb                 | Rabbit | Cell Signaling Technology | #85165         | IF (1:200)  |
| $\alpha$ -Tubulin          | Rabbit | Cell Signaling Technology | #2125          | IF (1:200)  |
| OCT4                       | Mouse  | Santa Cruz                | sc-5279        | IF (1:200)  |
| SOX17                      | Goat   | Bio-technie               | AF1924         | IF (1:200)  |
| YAP                        | Mouse  | Santa Cruz                | sc-101200      | IF (1:200)  |
| $\gamma$ -H2AX             | Mouse  | Abcam                     | ab26350        | IF (1:200)  |
| H3.3                       | Mouse  | Abnova                    | H00003021-M01  | IF (1:100)  |
| H3K27ac                    | Rabbit | Active Motif              | 39133          | IF (1:200)  |
| H3k14ac                    | Rabbit | Abcam                     | ab52946        | IF (1:200)  |
| H4K16ac                    | Rabbit | Abcam                     | ab109463       | IF (1:200)  |
| H3K4me3                    | Rabbit | Cell Signaling Technology | #9751          | IF (1:200)  |
| H3K9me2                    | Rabbit | Cell Signaling Technology | #9753          | IF (1:200)  |
| H3K27me3                   | Mouse  | Abcam                     | ab6002         | IF (1:200)  |
| TET1                       | Rat    | Active Motif              | 6174161742     | IF (1:200)  |
| DNMT3B                     | Mouse  | Novus Biologicals         | 52A1018        | IF (1:200)  |
| TEAD4                      | Mouse  | Abcam                     | ab58310        | IF (1:200)  |
| HDAC1                      | Mouse  | Cell Signaling Technology | #5356          | IF (1:200)  |
| HDAC2                      | Mouse  | Cell Signaling Technology | #5113          | IF (1:200)  |
| Sin3a                      | Rabbit | Abcam                     | Ab129087       | IF (1:200)  |
| P53-acetyl-lys379          | Rabbit | GeneTex                   | GTX88013       | IF (1:200)  |
| $\beta$ -Catenin           | Rabbit | Cell Signaling Technology | #8480          | IF (1:200)  |
| E-Cadherin                 | Rat    | Sigma-Aldrich             | U3254          | IF (1:1000) |
| Donkey anti-Rabbit 594     |        | Invitrogen                | A21207         | IF (1:100)  |
| Goat anti-Mouse 488        |        | Invitrogen                | A11001         | IF (1:100)  |
| Donkey anti-Goat 594       |        | Invitrogen                | A11058         | IF (1:100)  |
| Goat anti-Rabbit 488       |        | Invitrogen                | A11008         | IF (1:100)  |
| Donkey anti- Rabbit 488    |        | Invitrogen                | A21206         | IF (1:100)  |

**Table S3. Differentially expressed genes identified by RNA-seq between Rbbp4 depleted group and control group in mice (ranked by adjusted p (padj) value). Threshold: padj<=0.05 & FoldChange>=1.5 or FoldChange <= -1.5.**

|    | Gene.names      | FoldChange | padj     |    | Gene.names      | FoldChange | padj     |
|----|-----------------|------------|----------|----|-----------------|------------|----------|
| 1  | <i>Ndufa9</i>   | -29.178168 | 0.000000 | 14 | <i>Pank3</i>    | -2.440767  | 0.000000 |
| 2  | <i>Gm21293</i>  | -10.445230 | 0.012721 | 15 | <i>Max</i>      | -2.290331  | 0.000015 |
| 3  | <i>Rbbp4</i>    | -9.696435  | 0.000000 | 16 | <i>Cdkn1a</i>   | -2.253246  | 0.000479 |
| 4  | <i>Slc39a2</i>  | -5.679754  | 0.012721 | 17 | <i>Mob1a</i>    | -2.169439  | 0.000069 |
| 5  | <i>Sac3d1</i>   | -3.020487  | 0.012721 | 18 | <i>Dcbld2</i>   | 2.398497   | 0.000268 |
| 6  | <i>Pafah1b2</i> | -2.716613  | 0.000000 | 19 | <i>Acad10</i>   | 2.861932   | 0.048356 |
| 7  | <i>Mfn2</i>     | -2.701567  | 0.000268 | 20 | <i>Plau</i>     | 2.946342   | 0.000000 |
| 8  | <i>Plet1</i>    | -2.654351  | 0.006280 | 21 | <i>Cobll1</i>   | 3.081197   | 0.039153 |
| 9  | <i>Znrd1</i>    | -2.644248  | 0.049006 | 22 | <i>Pcnt</i>     | 4.359551   | 0.000946 |
| 10 | <i>Pigs</i>     | -2.581545  | 0.012773 | 23 | <i>Krt19</i>    | 5.660180   | 0.024327 |
| 11 | <i>Vnn1</i>     | -2.477782  | 0.008351 | 24 | <i>Csnk2a3</i>  | 9.735482   | 0.003627 |
| 12 | <i>Zfp367</i>   | -2.451932  | 0.010616 | 25 | <i>Arhgap33</i> | 19.492168  | 0.037088 |
| 13 | <i>Tat</i>      | -2.451456  | 0.013747 | 26 | <i>Gm12613</i>  | 21.880545  | 0.000115 |

**Table S4. Differentially expressed genes identified by RNA-seq between Rbbp7 depleted group and control group in mice (ranked by adjusted p (padj) value). Threshold: padj<=0.05 & FoldChange>=1.5 or FoldChange <= -1.5.**

|    | Gene.names       | FoldChange | padj     |     | Gene.names           | FoldChange | padj     |
|----|------------------|------------|----------|-----|----------------------|------------|----------|
| 1  | <i>Gm21304</i>   | -52.969104 | 0.004894 | 73  | <i>Map3k3</i>        | -1.882379  | 0.013558 |
| 2  | <i>Rbbp7</i>     | -12.209241 | 0.000000 | 74  | <i>Prdx6</i>         | -1.876643  | 0.000005 |
| 3  | <i>Csrnp3</i>    | -8.041018  | 0.007163 | 75  | <i>Efh2</i>          | -1.868912  | 0.030518 |
| 4  | <i>Sall3</i>     | -7.678287  | 0.039383 | 76  | <i>Smarcc1</i>       | -1.867213  | 0.002597 |
| 5  | <i>Obox8</i>     | -7.537744  | 0.029826 | 77  | <i>Tinagl1</i>       | -1.866183  | 0.041870 |
| 6  | <i>Epn3</i>      | -6.197603  | 0.004673 | 78  | <i>Fam83h</i>        | -1.859869  | 0.044077 |
| 7  | <i>Tcf4</i>      | -5.500898  | 0.002652 | 79  | <i>Prdx1</i>         | -1.845616  | 0.018787 |
| 8  | <i>Dppa1</i>     | -5.391131  | 0.004894 | 80  | <i>Sh3bgrl2</i>      | -1.808559  | 0.029562 |
| 9  | <i>Mbd1</i>      | -5.327907  | 0.034424 | 81  | <i>Smpd1</i>         | -1.807038  | 0.000520 |
| 10 | <i>Slc22a23</i>  | -5.260543  | 0.004815 | 82  | <i>Uhmk1</i>         | -1.764857  | 0.000081 |
| 11 | <i>Avil</i>      | -5.173581  | 0.013558 | 83  | <i>Tpm3-rs7</i>      | -1.764186  | 0.000645 |
| 12 | <i>Igf2</i>      | -5.088922  | 0.014032 | 84  | <i>Cdk2ap1</i>       | -1.762440  | 0.000035 |
| 13 | <i>Pcnx</i>      | -4.990652  | 0.026280 | 85  | <i>Smpd13a</i>       | -1.730856  | 0.008367 |
| 14 | <i>Ptpn4</i>     | -4.519104  | 0.035714 | 86  | <i>Dcbld2</i>        | -1.716857  | 0.022434 |
| 15 | <i>Fam133b</i>   | -4.413639  | 0.024125 | 87  | <i>Usp25</i>         | -1.709897  | 0.045118 |
| 16 | <i>Enpep</i>     | -4.190188  | 0.000000 | 88  | <i>Ecpas</i>         | -1.691110  | 0.002953 |
| 17 | <i>Lgals1</i>    | -4.151859  | 0.004219 | 89  | <i>Itgav</i>         | -1.684536  | 0.013425 |
| 18 | <i>Gnai1</i>     | -4.041768  | 0.005519 | 90  | <i>Wdr48</i>         | -1.681016  | 0.030392 |
| 19 | <i>Krt18</i>     | -3.916171  | 0.000000 | 91  | <i>Surf4</i>         | -1.676637  | 0.006368 |
| 20 | <i>Dipk2a</i>    | -3.805178  | 0.017846 | 92  | <i>Mkrn1</i>         | -1.663510  | 0.003045 |
| 21 | <i>Cpxm1</i>     | -3.799901  | 0.005533 | 93  | <i>Man2a1</i>        | -1.654582  | 0.030518 |
| 22 | <i>Mid1p1</i>    | -3.768777  | 0.029608 | 94  | <i>Dsp</i>           | -1.644744  | 0.035714 |
| 23 | <i>Krt7</i>      | -3.755746  | 0.019535 | 95  | <i>Wdr1</i>          | -1.639596  | 0.049088 |
| 24 | <i>Lgals9</i>    | -3.726269  | 0.017929 | 96  | <i>Larp4b</i>        | -1.630630  | 0.001422 |
| 25 | <i>Mphosph9</i>  | -3.691336  | 0.017929 | 97  | <i>Lrrfip1</i>       | -1.611761  | 0.045414 |
| 26 | <i>Fabp3</i>     | -3.607500  | 0.000000 | 98  | <i>Trp53bp2</i>      | -1.606328  | 0.006337 |
| 27 | <i>Tmem64</i>    | -3.580301  | 0.000000 | 99  | <i>Epcam</i>         | -1.597250  | 0.000506 |
| 28 | <i>Ugdh</i>      | -3.532711  | 0.018695 | 100 | <i>Kpna3</i>         | -1.592466  | 0.021863 |
| 29 | <i>Acsbg1</i>    | -3.436847  | 0.024250 | 101 | <i>Kif5b</i>         | -1.573044  | 0.014268 |
| 30 | <i>Hmgn5</i>     | -3.351583  | 0.000001 | 102 | <i>Lamp2</i>         | -1.553099  | 0.005390 |
| 31 | <i>Gk</i>        | -3.294552  | 0.004894 | 103 | <i>Gnai2</i>         | -1.538865  | 0.033978 |
| 32 | <i>Casc4</i>     | -3.237080  | 0.001965 | 104 | <i>Cs</i>            | -1.520087  | 0.004410 |
| 33 | <i>Oxct1</i>     | -3.213495  | 0.000015 | 105 | <i>Tdrp</i>          | -1.512550  | 0.003345 |
| 34 | <i>Oasl2</i>     | -3.209515  | 0.040185 | 106 | <i>Gss</i>           | -1.507530  | 0.004894 |
| 35 | <i>Hkdc1</i>     | -3.204702  | 0.035714 | 107 | <i>Rpl7l1</i>        | 1.504858   | 0.002878 |
| 36 | <i>Krt8</i>      | -3.143857  | 0.000000 | 108 | <i>Btbd18</i>        | 1.600703   | 0.047182 |
| 37 | <i>Neu1</i>      | -3.135836  | 0.000004 | 109 | <i>Mgat3</i>         | 1.660696   | 0.018668 |
| 38 | <i>Aldh1l1</i>   | -3.081474  | 0.028979 | 110 | <i>Nin</i>           | 1.677819   | 0.034677 |
| 39 | <i>Srxn1</i>     | -3.051171  | 0.012077 | 111 | <i>Esrrb</i>         | 1.724137   | 0.031575 |
| 40 | <i>Id2</i>       | -3.032006  | 0.006523 | 112 | <i>Fdft1</i>         | 1.726739   | 0.017929 |
| 41 | <i>Hmox1</i>     | -2.977399  | 0.013558 | 113 | <i>C130074G19Rik</i> | 1.736169   | 0.003475 |
| 42 | <i>Plekhb2</i>   | -2.889412  | 0.000731 | 114 | <i>Hk1</i>           | 1.745298   | 0.013558 |
| 43 | <i>Sec11a</i>    | -2.726497  | 0.000004 | 115 | <i>Pdrg1</i>         | 1.802602   | 0.004219 |
| 44 | <i>Dab2ip</i>    | -2.646504  | 0.000081 | 116 | <i>Rcc2</i>          | 1.857586   | 0.016845 |
| 45 | <i>Wnt7b</i>     | -2.644552  | 0.022039 | 117 | <i>Gpre5c</i>        | 2.044058   | 0.001725 |
| 46 | <i>Pdcd4</i>     | -2.637170  | 0.017663 | 118 | <i>Gemin4</i>        | 2.066205   | 0.036655 |
| 47 | <i>Serpinb9b</i> | -2.631519  | 0.000013 | 119 | <i>Fdx1</i>          | 2.092624   | 0.020442 |
| 48 | <i>Atp1b1</i>    | -2.567392  | 0.000031 | 120 | <i>Soes3</i>         | 2.166859   | 0.018695 |
| 49 | <i>Cubn</i>      | -2.485688  | 0.000309 | 121 | <i>Urm1</i>          | 2.238715   | 0.002953 |
| 50 | <i>Zfp367</i>    | -2.442021  | 0.002953 | 122 | <i>Tdpoz2</i>        | 2.260054   | 0.033450 |
| 51 | <i>Apoe</i>      | -2.431766  | 0.030518 | 123 | <i>Nkx6-2</i>        | 2.295950   | 0.020442 |
| 52 | <i>Cep55</i>     | -2.429618  | 0.038685 | 124 | <i>Sec1</i>          | 2.298934   | 0.012077 |
| 53 | <i>Capn2</i>     | -2.398755  | 0.021959 | 125 | <i>Trim43b</i>       | 2.386413   | 0.000040 |
| 54 | <i>Sema4g</i>    | -2.391392  | 0.028979 | 126 | <i>Ttc3</i>          | 2.422607   | 0.016365 |
| 55 | <i>Erbp2</i>     | -2.383151  | 0.006976 | 127 | <i>Arrb1</i>         | 2.495990   | 0.032967 |
| 56 | <i>Lama3</i>     | -2.341917  | 0.039118 | 128 | <i>Sox12</i>         | 2.533996   | 0.042322 |



|    |                             |           |          |     |                       |           |          |
|----|-----------------------------|-----------|----------|-----|-----------------------|-----------|----------|
| 57 | <b><i>D030056L22Rik</i></b> | -2.322732 | 0.005125 | 129 | <b><i>Trim43c</i></b> | 2.536245  | 0.000890 |
| 58 | <b><i>Sqstm1</i></b>        | -2.280566 | 0.000001 | 130 | <b><i>Rnf169</i></b>  | 2.581380  | 0.047182 |
| 59 | <b><i>Morf41l</i></b>       | -2.220800 | 0.000000 | 131 | <b><i>Ddit4</i></b>   | 2.610701  | 0.000058 |
| 60 | <b><i>Vps26a</i></b>        | -2.209144 | 0.000006 | 132 | <b><i>Col5a3</i></b>  | 2.780061  | 0.044801 |
| 61 | <b><i>Gas6</i></b>          | -2.197632 | 0.007077 | 133 | <b><i>Hsd17b1</i></b> | 3.030466  | 0.013425 |
| 62 | <b><i>Lrp2</i></b>          | -2.181080 | 0.000015 | 134 | <b><i>Tef</i></b>     | 3.364672  | 0.004592 |
| 63 | <b><i>Lima1</i></b>         | -2.178234 | 0.034424 | 135 | <b><i>Eng</i></b>     | 3.489151  | 0.004248 |
| 64 | <b><i>Lcp1</i></b>          | -2.124731 | 0.031575 | 136 | <b><i>Fgf4</i></b>    | 4.021575  | 0.000081 |
| 65 | <b><i>9530068E07Rik</i></b> | -2.097295 | 0.013425 | 137 | <b><i>Cers4</i></b>   | 4.267109  | 0.018695 |
| 66 | <b><i>Bcor</i></b>          | -2.006322 | 0.045414 | 138 | <b><i>Ank2</i></b>    | 4.825801  | 0.002597 |
| 67 | <b><i>Cyb5r3</i></b>        | -1.995265 | 0.008018 | 139 | <b><i>Pcnt</i></b>    | 5.212570  | 0.000003 |
| 68 | <b><i>Rab6a</i></b>         | -1.952622 | 0.003809 | 140 | <b><i>Hbs1l</i></b>   | 6.681758  | 0.022039 |
| 69 | <b><i>Elovl6</i></b>        | -1.946270 | 0.000731 | 141 | <b><i>Cacna1b</i></b> | 8.494671  | 0.004894 |
| 70 | <b><i>Frmd4b</i></b>        | -1.923429 | 0.039383 | 142 | <b><i>Mdga1</i></b>   | 8.597583  | 0.001725 |
| 71 | <b><i>Rnf38</i></b>         | -1.902923 | 0.013786 | 143 | <b><i>Csnk2a3</i></b> | 12.045722 | 0.000005 |
| 72 | <b><i>Palm3</i></b>         | -1.898117 | 0.017518 |     |                       |           |          |

**Table S5. Differentially expressed genes identified by RNA-seq between both RBBP4 and 7 depleted group and control group in mice (ranked by adjusted p (padj) value). Threshold: padj<=0.05 & FoldChange>=1.5 or FoldChange <= -1.5.**

|    | Gene.names       | FoldChange  | padj     |     | Gene.names           | FoldChange | padj     |
|----|------------------|-------------|----------|-----|----------------------|------------|----------|
| 1  | <i>Pomgnt2</i>   | -20.7783348 | 0.000193 | 225 | <i>Pdrg1</i>         | 1.93224294 | 0.000502 |
| 2  | <i>Btbd6</i>     | -19.2075597 | 0.000350 | 226 | <i>Cbs</i>           | 1.93250053 | 0.003040 |
| 3  | <i>Spcs2</i>     | -17.9086065 | 0.006536 | 227 | <i>Gm9864</i>        | 1.94442719 | 0.000005 |
| 4  | <i>Syngap1</i>   | -16.8890522 | 0.012668 | 228 | <i>Tet1</i>          | 1.94681121 | 0.000018 |
| 5  | <i>Rbbp7</i>     | -12.2007993 | 0.000000 | 229 | <i>Mapkapk3</i>      | 1.96397255 | 0.011296 |
| 6  | <i>Zfp934</i>    | -11.861218  | 0.000312 | 230 | <i>Ddx19b</i>        | 1.98272316 | 0.000033 |
| 7  | <i>Gm2541</i>    | -9.97493391 | 0.017939 | 231 | <i>Rap2a</i>         | 1.99165917 | 0.012468 |
| 8  | <i>Rbbp4</i>     | -9.52235835 | 0.000000 | 232 | <i>Lrrn4</i>         | 1.99337475 | 0.036774 |
| 9  | <i>Rps18-ps3</i> | -8.63705297 | 0.024221 | 233 | <i>C130026I21Rik</i> | 2.01380146 | 0.011482 |
| 10 | <i>Susd2</i>     | -7.68881107 | 0.026623 | 234 | <i>Cebpa</i>         | 2.02699238 | 0.032577 |
| 11 | <i>Pcbp4</i>     | -7.45443    | 0.000208 | 235 | <i>Zmat3</i>         | 2.03257153 | 0.000009 |
| 12 | <i>Ecm1</i>      | -7.32609007 | 0.029968 | 236 | <i>Cdc42bpg</i>      | 2.04406334 | 0.000260 |
| 13 | <i>Katnal1</i>   | -7.29934007 | 0.002954 | 237 | <i>Hspb1</i>         | 2.04935775 | 0.005132 |
| 14 | <i>Nckipsd</i>   | -6.45602184 | 0.003467 | 238 | <i>Gm10040</i>       | 2.05545581 | 0.006033 |
| 15 | <i>Slc22a23</i>  | -6.30245674 | 0.000080 | 239 | <i>Ankrd10</i>       | 2.09915854 | 0.036697 |
| 16 | <i>Mbd1</i>      | -6.25287164 | 0.003305 | 240 | <i>Cyb5b</i>         | 2.10330306 | 0.003896 |
| 17 | <i>Spata13</i>   | -6.05837976 | 0.000475 | 241 | <i>Serpine2</i>      | 2.10383913 | 0.036725 |
| 18 | <i>Tcf4</i>      | -5.68695458 | 0.000594 | 242 | <i>Slc27a3</i>       | 2.11542923 | 0.035074 |
| 19 | <i>Caena1h</i>   | -5.20497448 | 0.006771 | 243 | <i>Abhd6</i>         | 2.12102394 | 0.012409 |
| 20 | <i>Irf3</i>      | -5.19454564 | 0.002224 | 244 | <i>Cplane1</i>       | 2.14974343 | 0.001905 |
| 21 | <i>Cpxm1</i>     | -5.05791298 | 0.000019 | 245 | <i>Gata1</i>         | 2.18054408 | 0.004445 |
| 22 | <i>Vtn1</i>      | -4.99789092 | 0.000468 | 246 | <i>Plekhn2</i>       | 2.18293808 | 0.010386 |
| 23 | <i>Gm28439</i>   | -4.98187652 | 0.023536 | 247 | <i>Trim11</i>        | 2.19790885 | 0.009481 |
| 24 | <i>Ptpn4</i>     | -4.77949916 | 0.010298 | 248 | <i>Cmb1</i>          | 2.20171121 | 0.036002 |
| 25 | <i>Syp</i>       | -4.76456566 | 0.003477 | 249 | <i>Sp110</i>         | 2.20677774 | 0.003585 |
| 26 | <i>Plet1</i>     | -4.74467588 | 0.000000 | 250 | <i>Anapc4</i>        | 2.21095798 | 0.013906 |
| 27 | <i>Dmbx1</i>     | -4.66900754 | 0.000969 | 251 | <i>Plekhhg5</i>      | 2.21947242 | 0.013409 |
| 28 | <i>Lars2</i>     | -4.42282005 | 0.004763 | 252 | <i>Ctcl</i>          | 2.25785116 | 0.000671 |
| 29 | <i>Dok1</i>      | -4.3707729  | 0.000019 | 253 | <i>Rev1</i>          | 2.28167306 | 0.016077 |
| 30 | <i>Pik3cd</i>    | -4.29939265 | 0.000620 | 254 | <i>Efna3</i>         | 2.29854167 | 0.002815 |
| 31 | <i>Eif4a-ps4</i> | -4.22506569 | 0.004621 | 255 | <i>Ccp110</i>        | 2.29885576 | 0.018385 |
| 32 | <i>Id2</i>       | -4.21286975 | 0.000008 | 256 | <i>Btbd18</i>        | 2.30387279 | 0.000170 |
| 33 | <i>Tat</i>       | -4.19099987 | 0.000000 | 257 | <i>Ppp3ca</i>        | 2.30528977 | 0.006795 |
| 34 | <i>Glrx</i>      | -4.01346908 | 0.002007 | 258 | <i>Ptpns</i>         | 2.3151558  | 0.029994 |
| 35 | <i>Kcnab2</i>    | -3.95229843 | 0.023701 | 259 | <i>Tbc1d8</i>        | 2.35986365 | 0.016362 |
| 36 | <i>Wdr47</i>     | -3.89064727 | 0.000475 | 260 | <i>Plk2</i>          | 2.36940656 | 0.000609 |
| 37 | <i>Fhod1</i>     | -3.79047368 | 0.040640 | 261 | <i>Gm38393</i>       | 2.38436577 | 0.013906 |
| 38 | <i>Tmem131l</i>  | -3.75182538 | 0.030029 | 262 | <i>Wnk3</i>          | 2.39872921 | 0.002258 |
| 39 | <i>Kdelr1</i>    | -3.71954361 | 0.000007 | 263 | <i>H1f0</i>          | 2.39940002 | 0.016555 |
| 40 | <i>Hnrnp1</i>    | -3.54593397 | 0.000000 | 264 | <i>Tsen2</i>         | 2.39965857 | 0.033675 |
| 41 | <i>F2r1l</i>     | -3.49114586 | 0.016673 | 265 | <i>H3f3b</i>         | 2.41682539 | 0.000000 |
| 42 | <i>Pak6</i>      | -3.43949459 | 0.025526 | 266 | <i>Cep250</i>        | 2.42181633 | 0.013578 |
| 43 | <i>Fbxo3</i>     | -3.42560321 | 0.000033 | 267 | <i>Csrnp2</i>        | 2.42348133 | 0.013987 |
| 44 | <i>Cdc42ep1</i>  | -3.41960309 | 0.000257 | 268 | <i>Ddit4</i>         | 2.42434522 | 0.000124 |
| 45 | <i>Kif21b</i>    | -3.40038205 | 0.022252 | 269 | <i>Neto2</i>         | 2.42483228 | 0.036222 |
| 46 | <i>Erbb2</i>     | -3.34390478 | 0.000005 | 270 | <i>Ddhd1</i>         | 2.43188107 | 0.000170 |
| 47 | <i>Mfn2</i>      | -3.33440044 | 0.000000 | 271 | <i>2010300C02Rik</i> | 2.43630939 | 0.023701 |
| 48 | <i>Txndc16</i>   | -3.31784456 | 0.034999 | 272 | <i>Tubb6</i>         | 2.46489207 | 0.000208 |
| 49 | <i>Mfsd13a</i>   | -3.28929329 | 0.001283 | 273 | <i>Tchp</i>          | 2.47062086 | 0.011963 |
| 50 | <i>Flot1</i>     | -3.25888802 | 0.043173 | 274 | <i>Pmaip1</i>        | 2.48570017 | 0.000007 |
| 51 | <i>Nr4a1</i>     | -3.25122477 | 0.001754 | 275 | <i>AC132444.1</i>    | 2.48771838 | 0.006795 |
| 52 | <i>E2f2</i>      | -3.23609754 | 0.000475 | 276 | <i>Ddr2</i>          | 2.49469036 | 0.040640 |
| 53 | <i>Lrfr1</i>     | -3.1999459  | 0.003896 | 277 | <i>Tdpoz2</i>        | 2.50163807 | 0.005411 |
| 54 | <i>Znrd1</i>     | -3.199789   | 0.000370 | 278 | <i>Ptpn21</i>        | 2.50623697 | 0.004445 |
| 55 | <i>Igsf3</i>     | -3.19875066 | 0.001122 | 279 | <i>Def6</i>          | 2.52416407 | 0.026727 |
| 56 | <i>Tbc1d2b</i>   | -3.10364818 | 0.036983 | 280 | <i>Cry1</i>          | 2.5447563  | 0.000002 |

|     |                      |             |          |     |                      |            |          |
|-----|----------------------|-------------|----------|-----|----------------------|------------|----------|
| 57  | <i>Mmache</i>        | -3.09034607 | 0.014356 | 281 | <i>Rdh10</i>         | 2.54739601 | 0.000170 |
| 58  | <i>Bloc1s5</i>       | -2.96103292 | 0.042573 | 282 | <i>Cbx7</i>          | 2.54935621 | 0.003896 |
| 59  | <i>Tmem254b</i>      | -2.92250623 | 0.005786 | 283 | <i>Ergic1</i>        | 2.59330121 | 0.010959 |
| 60  | <i>Atp1b1</i>        | -2.9155029  | 0.000000 | 284 | <i>Nkx6-2</i>        | 2.60583293 | 0.001997 |
| 61  | <i>Mpzl2</i>         | -2.84708289 | 0.000050 | 285 | <i>Slc22a13b</i>     | 2.6085633  | 0.023908 |
| 62  | <i>Pank3</i>         | -2.83415604 | 0.000000 | 286 | <i>Mgarp</i>         | 2.61370903 | 0.000333 |
| 63  | <i>Vangl1</i>        | -2.80678882 | 0.013272 | 287 | <i>Hectd4</i>        | 2.61831402 | 0.000033 |
| 64  | <i>Krt18</i>         | -2.79975725 | 0.000008 | 288 | <i>Inpp1l</i>        | 2.6285218  | 0.000041 |
| 65  | <i>Pik3c2a</i>       | -2.79639624 | 0.000762 | 289 | <i>Btg2</i>          | 2.63788473 | 0.000295 |
| 66  | <i>Tmem106b</i>      | -2.79331672 | 0.041453 | 290 | <i>Rab31</i>         | 2.64500281 | 0.013066 |
| 67  | <i>Dtd2</i>          | -2.78579406 | 0.022002 | 291 | <i>Gadd45b</i>       | 2.65907788 | 0.026623 |
| 68  | <i>Ankrd50</i>       | -2.76187711 | 0.028565 | 292 | <i>Tctn1</i>         | 2.68823517 | 0.020971 |
| 69  | <i>Fmn13</i>         | -2.71536522 | 0.005984 | 293 | <i>Foxe1</i>         | 2.70522208 | 0.005786 |
| 70  | <i>Lin37</i>         | -2.71437152 | 0.014356 | 294 | <i>BC021767</i>      | 2.71221833 | 0.005307 |
| 71  | <i>Tubb5</i>         | -2.71233725 | 0.007908 | 295 | <i>E030030106Rik</i> | 2.72640243 | 0.006250 |
| 72  | <i>Sac3d1</i>        | -2.70626918 | 0.006113 | 296 | <i>Pcyox1</i>        | 2.73425037 | 0.001856 |
| 73  | <i>Zfp57</i>         | -2.69871    | 0.034416 | 297 | <i>Spred3</i>        | 2.73661492 | 0.027376 |
| 74  | <i>Mtm1</i>          | -2.69000753 | 0.033639 | 298 | <i>Micall1</i>       | 2.76350318 | 0.002831 |
| 75  | <i>Zfp367</i>        | -2.68670527 | 0.000221 | 299 | <i>Zfp326</i>        | 2.78010198 | 0.006219 |
| 76  | <i>2610001J05Rik</i> | -2.67135376 | 0.013385 | 300 | <i>Akap9</i>         | 2.79785039 | 0.041299 |
| 77  | <i>Smpd1</i>         | -2.66386942 | 0.000000 | 301 | <i>Tmem229b</i>      | 2.81908688 | 0.028907 |
| 78  | <i>Hmgn5</i>         | -2.66149956 | 0.000104 | 302 | <i>Hormad1</i>       | 2.82372757 | 0.026623 |
| 79  | <i>Ptpn3</i>         | -2.65194521 | 0.000076 | 303 | <i>Ina</i>           | 2.88575329 | 0.012103 |
| 80  | <i>Ckap2l</i>        | -2.59487877 | 0.002118 | 304 | <i>Slc25a42</i>      | 2.89070296 | 0.002428 |
| 81  | <i>Ugp2</i>          | -2.58582393 | 0.000170 | 305 | <i>Gm14401</i>       | 2.91338268 | 0.026623 |
| 82  | <i>Naga</i>          | -2.57095322 | 0.002388 | 306 | <i>Ddit4l</i>        | 3.010798   | 0.000065 |
| 83  | <i>Pafah1b2</i>      | -2.54365102 | 0.000000 | 307 | <i>Slc16a6</i>       | 3.02132448 | 0.000008 |
| 84  | <i>Plk3</i>          | -2.51950323 | 0.009537 | 308 | <i>Lrp1</i>          | 3.02521593 | 0.010874 |
| 85  | <i>Fabp3</i>         | -2.50822624 | 0.000000 | 309 | <i>Qpctl</i>         | 3.03573476 | 0.010509 |
| 86  | <i>Kpna2</i>         | -2.49986966 | 0.000000 | 310 | <i>S1pr2</i>         | 3.03721389 | 0.004749 |
| 87  | <i>Dab2ip</i>        | -2.48691805 | 0.000161 | 311 | <i>Dcbl2</i>         | 3.04777762 | 0.000000 |
| 88  | <i>Serpib9b</i>      | -2.47949391 | 0.000026 | 312 | <i>Akl</i>           | 3.05230838 | 0.018852 |
| 89  | <i>Prss8</i>         | -2.47303969 | 0.010505 | 313 | <i>Snrk</i>          | 3.06729272 | 0.009550 |
| 90  | <i>Cdca3</i>         | -2.43850898 | 0.000002 | 314 | <i>Epm2aip1</i>      | 3.09342315 | 0.000010 |
| 91  | <i>Efh2</i>          | -2.42702836 | 0.000475 | 315 | <i>Evisl</i>         | 3.10058578 | 0.043077 |
| 92  | <i>Lmna</i>          | -2.41378235 | 0.000316 | 316 | <i>Rnf169</i>        | 3.12406045 | 0.002893 |
| 93  | <i>Mob1a</i>         | -2.40997734 | 0.000000 | 317 | <i>Lgals9</i>        | 3.14305452 | 0.024626 |
| 94  | <i>Kif16b</i>        | -2.39059906 | 0.000651 | 318 | <i>Ptpn14</i>        | 3.22849468 | 0.003390 |
| 95  | <i>Nelfb</i>         | -2.38967616 | 0.005043 | 319 | <i>Col9a2</i>        | 3.23675648 | 0.000000 |
| 96  | <i>Cep55</i>         | -2.37760168 | 0.023536 | 320 | <i>Thyn1</i>         | 3.2647806  | 0.005536 |
| 97  | <i>St6galnac2</i>    | -2.37450001 | 0.000193 | 321 | <i>Nectin4</i>       | 3.26494939 | 0.022565 |
| 98  | <i>Nusap1</i>        | -2.37152223 | 0.033037 | 322 | <i>Slc37a2</i>       | 3.27620949 | 0.000370 |
| 99  | <i>Usp16</i>         | -2.3492201  | 0.000015 | 323 | <i>Nefh</i>          | 3.29121656 | 0.016537 |
| 100 | <i>Lama3</i>         | -2.33457335 | 0.020164 | 324 | <i>Cdh3</i>          | 3.30855249 | 0.003768 |
| 101 | <i>Zfp180</i>        | -2.30816697 | 0.027661 | 325 | <i>P2rx7</i>         | 3.30886548 | 0.000178 |
| 102 | <i>Pif1</i>          | -2.2946626  | 0.044253 | 326 | <i>Zhx3</i>          | 3.31261762 | 0.005411 |
| 103 | <i>Dsg2</i>          | -2.29365924 | 0.041299 | 327 | <i>Gm4779</i>        | 3.3152004  | 0.005373 |
| 104 | <i>Tmem79</i>        | -2.28053353 | 0.032628 | 328 | <i>Cpne1</i>         | 3.32459929 | 0.002224 |
| 105 | <i>Trp53bp2</i>      | -2.27396955 | 0.000002 | 329 | <i>Col5a3</i>        | 3.35917781 | 0.002793 |
| 106 | <i>Dlg3</i>          | -2.25917659 | 0.035393 | 330 | <i>Parp12</i>        | 3.37381287 | 0.036776 |
| 107 | <i>Myo18a</i>        | -2.25906694 | 0.035393 | 331 | <i>Slc44a2</i>       | 3.3763413  | 0.006121 |
| 108 | <i>Wdr1</i>          | -2.25117327 | 0.000475 | 332 | <i>Agpat4</i>        | 3.37983328 | 0.032628 |
| 109 | <i>Prr11</i>         | -2.24936925 | 0.008685 | 333 | <i>Pgap1</i>         | 3.38390372 | 0.000003 |
| 110 | <i>Casc4</i>         | -2.24223838 | 0.041453 | 334 | <i>Map3k20</i>       | 3.40461913 | 0.001468 |
| 111 | <i>Ncapd2</i>        | -2.23772026 | 0.000026 | 335 | <i>Cobl1l</i>        | 3.42155831 | 0.000908 |
| 112 | <i>Pdcd4</i>         | -2.20389172 | 0.039065 | 336 | <i>Ube2r2</i>        | 3.4286652  | 0.000906 |
| 113 | <i>Ptprn</i>         | -2.18638697 | 0.016083 | 337 | <i>Itgb4</i>         | 3.46080592 | 0.009085 |
| 114 | <i>Enpep</i>         | -2.17572868 | 0.000028 | 338 | <i>Pramef17</i>      | 3.47140035 | 0.006671 |
| 115 | <i>Clic4</i>         | -2.16638365 | 0.000001 | 339 | <i>Hspa1b</i>        | 3.47521578 | 0.000370 |
| 116 | <i>Gtpbp1</i>        | -2.12997606 | 0.012007 | 340 | <i>Nsmaf</i>         | 3.47611275 | 0.000000 |
| 117 | <i>Tinagl1</i>       | -2.12631794 | 0.005455 | 341 | <i>Prx</i>           | 3.49641987 | 0.040640 |
| 118 | <i>Ppp1ccb</i>       | -2.1031986  | 0.015957 | 342 | <i>Tmem63a</i>       | 3.50212056 | 0.037805 |

|     |                      |             |          |     |                      |            |          |
|-----|----------------------|-------------|----------|-----|----------------------|------------|----------|
| 119 | <i>Cdx2</i>          | -2.09968928 | 0.005786 | 343 | <i>Syt11</i>         | 3.5997837  | 0.022002 |
| 120 | <i>Mki67</i>         | -2.09315668 | 0.001304 | 344 | <i>Adap1</i>         | 3.62219463 | 0.003278 |
| 121 | <i>Tanc1</i>         | -2.08755268 | 0.010760 | 345 | <i>Gm5662</i>        | 3.63113518 | 0.011630 |
| 122 | <i>Itga5</i>         | -2.08321353 | 0.044796 | 346 | <i>Serinc5</i>       | 3.63799477 | 0.000161 |
| 123 | <i>Max</i>           | -2.06917403 | 0.000031 | 347 | <i>Mettl7a3</i>      | 3.65042188 | 0.018145 |
| 124 | <i>Nkiras2</i>       | -2.04041011 | 0.009268 | 348 | <i>Hlf10</i>         | 3.65457595 | 0.034241 |
| 125 | <i>Tmem254c</i>      | -2.03229263 | 0.014452 | 349 | <i>Azin2</i>         | 3.65505247 | 0.020121 |
| 126 | <i>Cyb5r3</i>        | -2.02776085 | 0.003014 | 350 | <i>AC125149.3</i>    | 3.66874564 | 0.000002 |
| 127 | <i>Mtf2</i>          | -2.02614442 | 0.000000 | 351 | <i>Sycp1</i>         | 3.68572145 | 0.000620 |
| 128 | <i>Gabarap</i>       | -1.99237693 | 0.005786 | 352 | <i>Cercam</i>        | 3.7008603  | 0.040016 |
| 129 | <i>Taf6l</i>         | -1.98814697 | 0.041299 | 353 | <i>B3gnt1</i>        | 3.70265173 | 0.009500 |
| 130 | <i>Slc35f6</i>       | -1.96869803 | 0.023621 | 354 | <i>Arrdc3</i>        | 3.74590596 | 0.000021 |
| 131 | <i>Smc6</i>          | -1.94702746 | 0.006795 | 355 | <i>Mrgprc2-ps</i>    | 3.77399489 | 0.005132 |
| 132 | <i>Smtn</i>          | -1.93773149 | 0.033675 | 356 | <i>Cd81</i>          | 3.78932659 | 0.000057 |
| 133 | <i>Nynrin</i>        | -1.93490412 | 0.007678 | 357 | <i>Hpcal1</i>        | 3.80819453 | 0.002815 |
| 134 | <i>Akr1b8</i>        | -1.92755881 | 0.020553 | 358 | <i>Sec1</i>          | 3.82899048 | 0.000000 |
| 135 | <i>Mtmr4</i>         | -1.91623472 | 0.002810 | 359 | <i>Pcnt</i>          | 3.84065033 | 0.001163 |
| 136 | <i>Ube2m</i>         | -1.90490799 | 0.000076 | 360 | <i>H2bc4</i>         | 3.87529959 | 0.047525 |
| 137 | <i>Chfr</i>          | -1.89706091 | 0.036776 | 361 | <i>Gm12183</i>       | 3.95101947 | 0.018852 |
| 138 | <i>Csf3r</i>         | -1.89458848 | 0.000802 | 362 | <i>Kctd15</i>        | 3.99868323 | 0.036776 |
| 139 | <i>Zc3h3</i>         | -1.89161915 | 0.023621 | 363 | <i>Fhl2</i>          | 4.04697325 | 0.027311 |
| 140 | <i>Shroom3</i>       | -1.83965585 | 0.034369 | 364 | <i>Klrg2</i>         | 4.07182514 | 0.000539 |
| 141 | <i>Ptges</i>         | -1.83145072 | 0.000030 | 365 | <i>Gm28036</i>       | 4.07482622 | 0.001311 |
| 142 | <i>Prkcsb</i>        | -1.82702924 | 0.003896 | 366 | <i>Srl</i>           | 4.07636621 | 0.002101 |
| 143 | <i>Arid3b</i>        | -1.82554074 | 0.039797 | 367 | <i>Ciita</i>         | 4.07900923 | 0.002037 |
| 144 | <i>Rnf185</i>        | -1.82455698 | 0.020900 | 368 | <i>H2aw</i>          | 4.08919196 | 0.001849 |
| 145 | <i>Vps50</i>         | -1.82289395 | 0.010095 | 369 | <i>Klhdc7a</i>       | 4.11290102 | 0.000000 |
| 146 | <i>Gab1</i>          | -1.81417637 | 0.005263 | 370 | <i>Bglap3</i>        | 4.13303887 | 0.000001 |
| 147 | <i>Patl1</i>         | -1.81387209 | 0.011482 | 371 | <i>Acad10</i>        | 4.14068008 | 0.000005 |
| 148 | <i>Acadyl</i>        | -1.79769781 | 0.013359 | 372 | <i>Gm13988</i>       | 4.16975388 | 0.000001 |
| 149 | <i>Mis12</i>         | -1.79348853 | 0.030203 | 373 | <i>Ldha</i>          | 4.17606089 | 0.000000 |
| 150 | <i>Pxk</i>           | -1.79181431 | 0.041998 | 374 | <i>Taok3</i>         | 4.17660771 | 0.007041 |
| 151 | <i>Pttg1</i>         | -1.78655341 | 0.013110 | 375 | <i>4933427I04Rik</i> | 4.23207693 | 0.000000 |
| 152 | <i>Lmo7</i>          | -1.74425333 | 0.036776 | 376 | <i>Hspa1a</i>        | 4.26455252 | 0.003164 |
| 153 | <i>Klf6</i>          | -1.72881061 | 0.011536 | 377 | <i>Gdpd1</i>         | 4.38162795 | 0.018756 |
| 154 | <i>Ppp1r11</i>       | -1.71912217 | 0.034137 | 378 | <i>Limch1</i>        | 4.39448362 | 0.023618 |
| 155 | <i>Zc3h7a</i>        | -1.71004222 | 0.023701 | 379 | <i>Cd209c</i>        | 4.50179724 | 0.000000 |
| 156 | <i>Agpat2</i>        | -1.70928374 | 0.007434 | 380 | <i>Tex15</i>         | 4.52118687 | 0.010874 |
| 157 | <i>Till12</i>        | -1.69727791 | 0.004445 | 381 | <i>Uchl1</i>         | 4.56470836 | 0.000000 |
| 158 | <i>Vac14</i>         | -1.69364045 | 0.036697 | 382 | <i>Nfam1</i>         | 4.60338499 | 0.003454 |
| 159 | <i>Racgap1</i>       | -1.6905866  | 0.021843 | 383 | <i>Gm11331</i>       | 4.61081417 | 0.000000 |
| 160 | <i>Osbpl7</i>        | -1.68721863 | 0.027993 | 384 | <i>Dusp1</i>         | 4.64101791 | 0.000001 |
| 161 | <i>Depdc7</i>        | -1.68630504 | 0.028083 | 385 | <i>Rgn</i>           | 4.65728807 | 0.019100 |
| 162 | <i>9530068E07Rik</i> | -1.6764872  | 0.043173 | 386 | <i>H60b</i>          | 4.66160458 | 0.000370 |
| 163 | <i>Strip1</i>        | -1.66622677 | 0.030286 | 387 | <i>Cd1d1</i>         | 4.66174217 | 0.000553 |
| 164 | <i>Net1</i>          | -1.66342364 | 0.006527 | 388 | <i>S100a6</i>        | 4.69654354 | 0.023618 |
| 165 | <i>Dusp4</i>         | -1.66200208 | 0.016537 | 389 | <i>Plekhg1</i>       | 4.71289638 | 0.049851 |
| 166 | <i>Ptpn12</i>        | -1.65998641 | 0.011885 | 390 | <i>Tuba3a</i>        | 4.75308334 | 0.011081 |
| 167 | <i>Tollip</i>        | -1.65076648 | 0.002831 | 391 | <i>Foxb2</i>         | 4.76129865 | 0.005132 |
| 168 | <i>Stard10</i>       | -1.64221086 | 0.000584 | 392 | <i>Prr18</i>         | 4.78976713 | 0.022473 |
| 169 | <i>Ctdspl2</i>       | -1.63157472 | 0.005819 | 393 | <i>Fbxo10</i>        | 4.79475619 | 0.043199 |
| 170 | <i>Bmyc</i>          | -1.62291885 | 0.011760 | 394 | <i>H2-Eb1</i>        | 4.79752302 | 0.002246 |
| 171 | <i>Dap</i>           | -1.61310682 | 0.004476 | 395 | <i>Rhov</i>          | 4.90935451 | 0.000403 |
| 172 | <i>Dlc1</i>          | -1.61262302 | 0.034308 | 396 | <i>Plek2</i>         | 4.91713317 | 0.005164 |
| 173 | <i>Fbxo5</i>         | -1.60739502 | 0.025204 | 397 | <i>Mtcl1</i>         | 4.96341938 | 0.016553 |
| 174 | <i>Trim28</i>        | -1.60415949 | 0.000000 | 398 | <i>Wipil</i>         | 4.98284934 | 0.015957 |
| 175 | <i>Mt2</i>           | -1.5942789  | 0.001856 | 399 | <i>Tef</i>           | 5.12896337 | 0.000000 |
| 176 | <i>St6galnac4</i>    | -1.58815077 | 0.037805 | 400 | <i>Vav1</i>          | 5.14445417 | 0.000001 |
| 177 | <i>Palm3</i>         | -1.58503968 | 0.038396 | 401 | <i>Rasa4</i>         | 5.18642656 | 0.000047 |
| 178 | <i>Tmem231</i>       | -1.58298781 | 0.004081 | 402 | <i>Twsg1</i>         | 5.24456956 | 0.000185 |
| 179 | <i>Osbpl8</i>        | -1.5791924  | 0.006593 | 403 | <i>Eng</i>           | 5.28436297 | 0.000000 |
| 180 | <i>Surf4</i>         | -1.57822771 | 0.005786 | 404 | <i>Lmod3</i>         | 5.28987181 | 0.023932 |

|     |                      |             |          |     |                 |            |          |
|-----|----------------------|-------------|----------|-----|-----------------|------------|----------|
| 181 | <i>Cenpa</i>         | -1.57631757 | 0.020664 | 405 | <i>Ccdc125</i>  | 5.31000747 | 0.042856 |
| 182 | <i>Kpna3</i>         | -1.57349153 | 0.011626 | 406 | <i>Plau</i>     | 5.3105284  | 0.000000 |
| 183 | <i>Vps26a</i>        | -1.57117602 | 0.002810 | 407 | <i>Foxl2</i>    | 5.51015316 | 0.038779 |
| 184 | <i>Srrt</i>          | -1.56452235 | 0.022830 | 408 | <i>Pgbd5</i>    | 5.53741136 | 0.004749 |
| 185 | <i>Krt8</i>          | -1.56173569 | 0.014979 | 409 | <i>Oas1e</i>    | 5.53983877 | 0.000015 |
| 186 | <i>Ptbp3</i>         | -1.55896765 | 0.002376 | 410 | <i>Stox1</i>    | 5.58732543 | 0.027311 |
| 187 | <i>Mef2d</i>         | -1.55604896 | 0.011296 | 411 | <i>Gpx3</i>     | 5.6034883  | 0.017253 |
| 188 | <i>Rnf213</i>        | -1.55493279 | 0.002212 | 412 | <i>Sox9</i>     | 5.65447335 | 0.000007 |
| 189 | <i>Btrc</i>          | -1.54831566 | 0.000078 | 413 | <i>Robo3</i>    | 5.66268635 | 0.017506 |
| 190 | <i>Ripor1</i>        | -1.53564143 | 0.025577 | 414 | <i>Hbs1l</i>    | 5.72044444 | 0.040115 |
| 191 | <i>Kank2</i>         | 1.51847623  | 0.025239 | 415 | <i>Eif4e1b</i>  | 5.74203697 | 0.000010 |
| 192 | <i>Tmem63b</i>       | 1.54570703  | 0.035741 | 416 | <i>Tmc7</i>     | 5.76309554 | 0.033675 |
| 193 | <i>Man2b1</i>        | 1.57555436  | 0.037805 | 417 | <i>Il34</i>     | 5.83925948 | 0.017373 |
| 194 | <i>Stard4</i>        | 1.5763815   | 0.002058 | 418 | <i>Synm</i>     | 6.00513511 | 0.000423 |
| 195 | <i>Timm29</i>        | 1.60361201  | 0.040161 | 419 | <i>Bbs7</i>     | 6.02309765 | 0.000008 |
| 196 | <i>Sirt1</i>         | 1.6043537   | 0.002723 | 420 | <i>Foxq1</i>    | 6.12685042 | 0.047602 |
| 197 | <i>Mdm2</i>          | 1.61031631  | 0.000685 | 421 | <i>Slc4a8</i>   | 6.14678348 | 0.000072 |
| 198 | <i>Slc66a2</i>       | 1.61386611  | 0.023618 | 422 | <i>Trim7</i>    | 6.1502463  | 0.001736 |
| 199 | <i>Fdft1</i>         | 1.62479404  | 0.014402 | 423 | <i>Sema6a</i>   | 6.1624148  | 0.000769 |
| 200 | <i>Ric1</i>          | 1.62518782  | 0.036776 | 424 | <i>Txnip</i>    | 6.16755946 | 0.018892 |
| 201 | <i>Dhx32</i>         | 1.64766927  | 0.007718 | 425 | <i>Ptafr</i>    | 6.18849072 | 0.028565 |
| 202 | <i>Cadm1</i>         | 1.6553278   | 0.014903 | 426 | <i>Pnma2</i>    | 6.21314343 | 0.001036 |
| 203 | <i>Nin</i>           | 1.66736196  | 0.017555 | 427 | <i>Mgl2</i>     | 6.29813999 | 0.000001 |
| 204 | <i>Acad11</i>        | 1.67909196  | 0.027933 | 428 | <i>Garnl3</i>   | 6.33858737 | 0.013279 |
| 205 | <i>Vav2</i>          | 1.72587592  | 0.005278 | 429 | <i>BC051019</i> | 6.82571542 | 0.000000 |
| 206 | <i>Wdr35</i>         | 1.72629146  | 0.018949 | 430 | <i>Sall3</i>    | 6.88282377 | 0.006016 |
| 207 | <i>Myo9b</i>         | 1.72821999  | 0.017024 | 431 | <i>Dop1b</i>    | 6.9955999  | 0.037805 |
| 208 | <i>Smcr8</i>         | 1.73015862  | 0.009700 | 432 | <i>Cdhr2</i>    | 7.11228903 | 0.000137 |
| 209 | <i>Ccdc117</i>       | 1.73323542  | 0.000196 | 433 | <i>Klrb1a</i>   | 7.21229102 | 0.028565 |
| 210 | <i>Zfp239</i>        | 1.73405942  | 0.023932 | 434 | <i>Tekt2</i>    | 7.32568282 | 0.041299 |
| 211 | <i>Rbsn</i>          | 1.75601834  | 0.012616 | 435 | <i>Peg10</i>    | 7.53443929 | 0.005094 |
| 212 | <i>Trp53bp1</i>      | 1.7631879   | 0.023273 | 436 | <i>Acvrl1</i>   | 8.08506545 | 0.020869 |
| 213 | <i>Ryr1</i>          | 1.76425522  | 0.010959 | 437 | <i>Adcy5</i>    | 8.14108578 | 0.000026 |
| 214 | <i>Psg16</i>         | 1.77995647  | 0.004168 | 438 | <i>Krt19</i>    | 8.85540902 | 0.000000 |
| 215 | <i>AA467197</i>      | 1.79013578  | 0.013066 | 439 | <i>Csnk2a3</i>  | 9.84790008 | 0.000294 |
| 216 | <i>Rbm38</i>         | 1.82882873  | 0.010874 | 440 | <i>Gabrr1</i>   | 10.7204597 | 0.032628 |
| 217 | <i>Ing1</i>          | 1.8456153   | 0.032577 | 441 | <i>Elovl3</i>   | 13.4286338 | 0.000000 |
| 218 | <i>Urm1</i>          | 1.84733961  | 0.012329 | 442 | <i>Arhgap33</i> | 18.2747841 | 0.008108 |
| 219 | <i>Cdc7</i>          | 1.85895242  | 0.017129 | 443 | <i>Vcan</i>     | 18.3132705 | 0.006677 |
| 220 | <i>Resf1</i>         | 1.88145306  | 0.001856 | 444 | <i>Cd247</i>    | 19.3238317 | 0.002237 |
| 221 | <i>Phlda3</i>        | 1.91990025  | 0.003503 | 445 | <i>Tusc3</i>    | 22.0708717 | 0.000350 |
| 222 | <i>Cth</i>           | 1.92579998  | 0.000741 | 446 | <i>Gm12613</i>  | 24.3199762 | 0.000001 |
| 223 | <i>Klhl22</i>        | 1.92663738  | 0.039065 | 447 | <i>Rsc1a1</i>   | 47.793453  | 0.006881 |
| 224 | <i>I0C0044D17Rik</i> | 1.92766068  | 0.038255 |     |                 |            |          |
