# Supplementary material
Source: publisher figshare collection journal article supplement (https://tandf.figshare.com/articles/dataset/_/16896971)
Supplement: Supplementary file 1 [file 1]

**Table S1：siRNA information**

**Table S2：Antibody information**

**Table S3. Differentially expressed genes identified by RNA-seq between Rbbp4 depleted group and control group in mice (ranked by adjusted p (padj) value). Threshold: padj<=0.05 & FoldChange>=1.5 or FoldChange <= -1.5.**

**Table S4. Differentially expressed genes identified by RNA-seq between Rbbp7 depleted group and control group in mice (ranked by adjusted p (padj) value). Threshold: padj<=0.05 & FoldChange>=1.5 or FoldChange <= -1.5.**

**Table S5. Differentially expressed genes identified by RNA-seq between both RBBP4 and 7 depleted group and control group in mice (ranked by adjusted p (padj) value). Threshold: padj<=0.05 & FoldChange>=1.5 or FoldChange <= -1.5.**

**Table S1：siRNA information**

| Name | Species | Sequences (5’ to 3’) |
| --- | --- | --- |
| Rbbp4-Mus-526 | Mouse | Sense: CCCGGUACAUGCCUCAGAATT  Antisense: UUCUGAGGCAUGUACCGGGTT |
| Rbbp4-Mus-609 | Mouse | Sense: CCUUCUAAACCAGACCCUUTT  Antisense: AAGGGUCUGGUUUAGAAGGTT |
| Rbbp4-Mus-901 | Mouse | Sense: GGGACACUCGUUCAAACAATT  Antisense: UUGUUUGAACGAGUGUCCCTT |
| Rbbp7-Mus-419 | Mouse | Sense: GGUUAUGACCCAUGCUCUUTT  Antisense: AAGAGCAUGGGUCAUAACCTT |
| Rbbp7-Mus-888 | Mouse | Sense: GGGCAUCUCCUGAGUGCAUTT  Antisense: AUGCACUCAGGAGAUGCCCTT |
| Rbbp7-Mus-1028 | Mouse | Sense: GCUGCAUGAGUCCUUGUUUTT  Antisense: AAACAAGGACUCAUGCAGCTT |

**Table S2：Antibody information**

| Name | Host | Company | Catalog Number | Application |
| --- | --- | --- | --- | --- |
| RBBP4 | Rabbit | Abcam | ab79416 | IF (1:200) |
| RBBP7 | Rabbit | Cell Signaling Technology | #6882 | IF (1:200) |
| Phospho-Histone H3 (Ser10) | Rabbit | Cell Signaling Technology | #3377 | IF (1:200) |
| Phospho-Rb | Rabbit | Cell Signaling Technology | #85165 | IF (1:200) |
| α-Tubulin | Rabbit | Cell Signaling Technology | #2125 | IF (1:200) |
| OCT4 | Mouse | Santa Cruz | sc-5279 | IF (1:200) |
| SOX17 | Goat | Bio-techne | AF1924 | IF (1:200) |
| YAP | Mouse | Santa Cruz | sc-101200 | IF (1:200) |
| γ-H2AX | Mouse | Abcam | ab26350 | IF (1:200) |
| H3.3 | Mouse | Abnova | H00003021-M01 | IF (1:100) |
| H3K27ac | Rabbit | Active Motif | 39133 | IF (1:200) |
| H3k14ac | Rabbit | Abcam | ab52946 | IF (1:200) |
| H4K16ac | Rabbit | Abcam | ab109463 | IF (1:200) |
| H3K4me3 | Rabbit | Cell Signaling Technology | #9751 | IF (1:200) |
| H3K9me2 | Rabbit | Cell Signaling Technology | #9753 | IF (1:200) |
| H3K27me3 | Mouse | Abcam | ab6002 | IF (1:200) |
| TET1 | Rat | Active Motif | 6174161742 | IF (1:200) |
| DNMT3B | Mouse | Novus Biologicals | 52A1018 | IF (1:200) |
| TEAD4 | Mouse | Abcam | ab58310 | IF (1:200) |
| HDAC1 | Mouse | Cell Signaling Technology | #5356 | IF (1:200) |
| HDAC2 | Mouse | Cell Signaling Technology | #5113 | IF (1:200) |
| Sin3a | Rabbit | Abcam | Ab129087 | IF (1:200) |
| P53-acetyl-lys379 | Rabbit | GeneTex | GTX88013 | IF (1:200) |
| β-Catenin | Rabbit | Cell Signaling Technology | #8480 | IF (1:200) |
| E-Cadherin | Rat | Sigma-Aldrich | U3254 | IF (1:1000) |
| Donkey anti-Rabbit 594 |  | Invitrogen | A21207 | IF (1:100) |
| Goat anti-Mouse 488 |  | Invitrogen | A11001 | IF (1:100) |
| Donkey anti-Goat 594 |  | Invitrogen | A11058 | IF (1:100) |
| Goat anti-Rabbit 488 |  | Invitrogen | A11008 | IF (1:100) |
| Donkey anti- Rabbit 488 |  | Invitrogen | A21206 | IF (1:100) |

**Table S3. Differentially expressed genes identified by RNA-seq between Rbbp4 depleted group and control group in mice (ranked by adjusted p (padj) value). Threshold: padj<=0.05 & FoldChange>=1.5 or FoldChange <= -1.5.**

|  | Gene.names | FoldChange | padj |  | Gene.names | FoldChange | padj |
| --- | --- | --- | --- | --- | --- | --- | --- |
| 1 | ***Ndufa9*** | -29.178168 | 0.000000 | 14 | ***Pank3*** | -2.440767 | 0.000000 |
| 2 | ***Gm21293*** | -10.445230 | 0.012721 | 15 | ***Max*** | -2.290331 | 0.000015 |
| 3 | ***Rbbp4*** | -9.696435 | 0.000000 | 16 | ***Cdkn1a*** | -2.253246 | 0.000479 |
| 4 | ***Slc39a2*** | -5.679754 | 0.012721 | 17 | ***Mob1a*** | -2.169439 | 0.000069 |
| 5 | ***Sac3d1*** | -3.020487 | 0.012721 | 18 | ***Dcbld2*** | 2.398497 | 0.000268 |
| 6 | ***Pafah1b2*** | -2.716613 | 0.000000 | 19 | ***Acad10*** | 2.861932 | 0.048356 |
| 7 | ***Mfn2*** | -2.701567 | 0.000268 | 20 | ***Plau*** | 2.946342 | 0.000000 |
| 8 | ***Plet1*** | -2.654351 | 0.006280 | 21 | ***Cobll1*** | 3.081197 | 0.039153 |
| 9 | ***Znrd1*** | -2.644248 | 0.049006 | 22 | ***Pcnt*** | 4.359551 | 0.000946 |
| 10 | ***Pigs*** | -2.581545 | 0.012773 | 23 | ***Krt19*** | 5.660180 | 0.024327 |
| 11 | ***Vnn1*** | -2.477782 | 0.008351 | 24 | ***Csnk2a3*** | 9.735482 | 0.003627 |
| 12 | ***Zfp367*** | -2.451932 | 0.010616 | 25 | ***Arhgap33*** | 19.492168 | 0.037088 |
| 13 | ***Tat*** | -2.451456 | 0.013747 | 26 | ***Gm12613*** | 21.880545 | 0.000115 |

**Table S4. Differentially expressed genes identified by RNA-seq between Rbbp7 depleted group and control group in mice (ranked by adjusted p (padj) value). Threshold: padj<=0.05 & FoldChange>=1.5 or FoldChange <= -1.5.**

|  | Gene.names | FoldChange | padj |  | Gene.names | FoldChange | padj |
| --- | --- | --- | --- | --- | --- | --- | --- |
| 1 | ***Gm21304*** | -52.969104 | 0.004894 | 73 | ***Map3k3*** | -1.882379 | 0.013558 |
| 2 | ***Rbbp7*** | -12.209241 | 0.000000 | 74 | ***Prdx6*** | -1.876643 | 0.000005 |
| 3 | ***Csrnp3*** | -8.041018 | 0.007163 | 75 | ***Efhd2*** | -1.868912 | 0.030518 |
| 4 | ***Sall3*** | -7.678287 | 0.039383 | 76 | ***Smarcc1*** | -1.867213 | 0.002597 |
| 5 | ***Obox8*** | -7.537744 | 0.029826 | 77 | ***Tinagl1*** | -1.866183 | 0.041870 |
| 6 | ***Epn3*** | -6.197603 | 0.004673 | 78 | ***Fam83h*** | -1.859869 | 0.044077 |
| 7 | ***Tcf4*** | -5.500898 | 0.002652 | 79 | ***Prdx1*** | -1.845616 | 0.018787 |
| 8 | ***Dppa1*** | -5.391131 | 0.004894 | 80 | ***Sh3bgrl2*** | -1.808559 | 0.029562 |
| 9 | ***Mbd1*** | -5.327907 | 0.034424 | 81 | ***Smpd1*** | -1.807038 | 0.000520 |
| 10 | ***Slc22a23*** | -5.260543 | 0.004815 | 82 | ***Uhmk1*** | -1.764857 | 0.000081 |
| 11 | ***Avil*** | -5.173581 | 0.013558 | 83 | ***Tpm3-rs7*** | -1.764186 | 0.000645 |
| 12 | ***Igf2*** | -5.088922 | 0.014032 | 84 | ***Cdk2ap1*** | -1.762440 | 0.000035 |
| 13 | ***Pcnx*** | -4.990652 | 0.026280 | 85 | ***Smpdl3a*** | -1.730856 | 0.008367 |
| 14 | ***Ptpn4*** | -4.519104 | 0.035714 | 86 | ***Dcbld2*** | -1.716857 | 0.022434 |
| 15 | ***Fam133b*** | -4.413639 | 0.024125 | 87 | ***Usp25*** | -1.709897 | 0.045118 |
| 16 | ***Enpep*** | -4.190188 | 0.000000 | 88 | ***Ecpas*** | -1.691110 | 0.002953 |
| 17 | ***Lgals1*** | -4.151859 | 0.004219 | 89 | ***Itgav*** | -1.684536 | 0.013425 |
| 18 | ***Gnai1*** | -4.041768 | 0.005519 | 90 | ***Wdr48*** | -1.681016 | 0.030392 |
| 19 | ***Krt18*** | -3.916171 | 0.000000 | 91 | ***Surf4*** | -1.676637 | 0.006368 |
| 20 | ***Dipk2a*** | -3.805178 | 0.017846 | 92 | ***Mkrn1*** | -1.663510 | 0.003045 |
| 21 | ***Cpxm1*** | -3.799901 | 0.005533 | 93 | ***Man2a1*** | -1.654582 | 0.030518 |
| 22 | ***Mid1ip1*** | -3.768777 | 0.029608 | 94 | ***Dsp*** | -1.644744 | 0.035714 |
| 23 | ***Krt7*** | -3.755746 | 0.019535 | 95 | ***Wdr1*** | -1.639596 | 0.049088 |
| 24 | ***Lgals9*** | -3.726269 | 0.017929 | 96 | ***Larp4b*** | -1.630630 | 0.001422 |
| 25 | ***Mphosph9*** | -3.691336 | 0.017929 | 97 | ***Lrrfip1*** | -1.611761 | 0.045414 |
| 26 | ***Fabp3*** | -3.607500 | 0.000000 | 98 | ***Trp53bp2*** | -1.606328 | 0.006337 |
| 27 | ***Tmem64*** | -3.580301 | 0.000000 | 99 | ***Epcam*** | -1.597250 | 0.000506 |
| 28 | ***Ugdh*** | -3.532711 | 0.018695 | 100 | ***Kpna3*** | -1.592466 | 0.021863 |
| 29 | ***Acsbg1*** | -3.436847 | 0.024250 | 101 | ***Kif5b*** | -1.573044 | 0.014268 |
| 30 | ***Hmgn5*** | -3.351583 | 0.000001 | 102 | ***Lamp2*** | -1.553099 | 0.005390 |
| 31 | ***Gk*** | -3.294552 | 0.004894 | 103 | ***Gnai2*** | -1.538865 | 0.033978 |
| 32 | ***Casc4*** | -3.237080 | 0.001965 | 104 | ***Cs*** | -1.520087 | 0.004410 |
| 33 | ***Oxct1*** | -3.213495 | 0.000015 | 105 | ***Tdrp*** | -1.512550 | 0.003345 |
| 34 | ***Oasl2*** | -3.209515 | 0.040185 | 106 | ***Gss*** | -1.507530 | 0.004894 |
| 35 | ***Hkdc1*** | -3.204702 | 0.035714 | 107 | ***Rpl7l1*** | 1.504858 | 0.002878 |
| 36 | ***Krt8*** | -3.143857 | 0.000000 | 108 | ***Btbd18*** | 1.600703 | 0.047182 |
| 37 | ***Neu1*** | -3.135836 | 0.000004 | 109 | ***Mgat3*** | 1.660696 | 0.018668 |
| 38 | ***Aldh1l1*** | -3.081474 | 0.028979 | 110 | ***Nin*** | 1.677819 | 0.034677 |
| 39 | ***Srxn1*** | -3.051171 | 0.012077 | 111 | ***Esrrb*** | 1.724137 | 0.031575 |
| 40 | ***Id2*** | -3.032006 | 0.006523 | 112 | ***Fdft1*** | 1.726739 | 0.017929 |
| 41 | ***Hmox1*** | -2.977399 | 0.013558 | 113 | ***C130074G19Rik*** | 1.736169 | 0.003475 |
| 42 | ***Plekhb2*** | -2.889412 | 0.000731 | 114 | ***Hk1*** | 1.745298 | 0.013558 |
| 43 | ***Sec11a*** | -2.726497 | 0.000004 | 115 | ***Pdrg1*** | 1.802602 | 0.004219 |
| 44 | ***Dab2ip*** | -2.646504 | 0.000081 | 116 | ***Rcc2*** | 1.857586 | 0.016845 |
| 45 | ***Wnt7b*** | -2.644552 | 0.022039 | 117 | ***Gprc5c*** | 2.044058 | 0.001725 |
| 46 | ***Pdcd4*** | -2.637170 | 0.017663 | 118 | ***Gemin4*** | 2.066205 | 0.036655 |
| 47 | ***Serpinb9b*** | -2.631519 | 0.000013 | 119 | ***Fdx1*** | 2.092624 | 0.020442 |
| 48 | ***Atp1b1*** | -2.567392 | 0.000031 | 120 | ***Socs3*** | 2.166859 | 0.018695 |
| 49 | ***Cubn*** | -2.485688 | 0.000309 | 121 | ***Urm1*** | 2.238715 | 0.002953 |
| 50 | ***Zfp367*** | -2.442021 | 0.002953 | 122 | ***Tdpoz2*** | 2.260054 | 0.033450 |
| 51 | ***Apoe*** | -2.431766 | 0.030518 | 123 | ***Nkx6-2*** | 2.295950 | 0.020442 |
| 52 | ***Cep55*** | -2.429618 | 0.038685 | 124 | ***Sec1*** | 2.298934 | 0.012077 |
| 53 | ***Capn2*** | -2.398755 | 0.021959 | 125 | ***Trim43b*** | 2.386413 | 0.000040 |
| 54 | ***Sema4g*** | -2.391392 | 0.028979 | 126 | ***Ttc3*** | 2.422607 | 0.016365 |
| 55 | ***Erbb2*** | -2.383151 | 0.006976 | 127 | ***Arrb1*** | 2.495990 | 0.032967 |
| 56 | ***Lama3*** | -2.341917 | 0.039118 | 128 | ***Sox12*** | 2.533996 | 0.042322 |
| 57 | ***D030056L22Rik*** | -2.322732 | 0.005125 | 129 | ***Trim43c*** | 2.536245 | 0.000890 |
| 58 | ***Sqstm1*** | -2.280566 | 0.000001 | 130 | ***Rnf169*** | 2.581380 | 0.047182 |
| 59 | ***Morf4l1*** | -2.220800 | 0.000000 | 131 | ***Ddit4*** | 2.610701 | 0.000058 |
| 60 | ***Vps26a*** | -2.209144 | 0.000006 | 132 | ***Col5a3*** | 2.780061 | 0.044801 |
| 61 | ***Gas6*** | -2.197632 | 0.007077 | 133 | ***Hsd17b1*** | 3.030466 | 0.013425 |
| 62 | ***Lrp2*** | -2.181080 | 0.000015 | 134 | ***Tef*** | 3.364672 | 0.004592 |
| 63 | ***Lima1*** | -2.178234 | 0.034424 | 135 | ***Eng*** | 3.489151 | 0.004248 |
| 64 | ***Lcp1*** | -2.124731 | 0.031575 | 136 | ***Fgf4*** | 4.021575 | 0.000081 |
| 65 | ***9530068E07Rik*** | -2.097295 | 0.013425 | 137 | ***Cers4*** | 4.267109 | 0.018695 |
| 66 | ***Bcor*** | -2.006322 | 0.045414 | 138 | ***Ank2*** | 4.825801 | 0.002597 |
| 67 | ***Cyb5r3*** | -1.995265 | 0.008018 | 139 | ***Pcnt*** | 5.212570 | 0.000003 |
| 68 | ***Rab6a*** | -1.952622 | 0.003809 | 140 | ***Hbs1l*** | 6.681758 | 0.022039 |
| 69 | ***Elovl6*** | -1.946270 | 0.000731 | 141 | ***Cacna1b*** | 8.494671 | 0.004894 |
| 70 | ***Frmd4b*** | -1.923429 | 0.039383 | 142 | ***Mdga1*** | 8.597583 | 0.001725 |
| 71 | ***Rnf38*** | -1.902923 | 0.013786 | 143 | ***Csnk2a3*** | 12.045722 | 0.000005 |
| 72 | ***Palm3*** | -1.898117 | 0.017518 |  |  |  |  |

**Table S5. Differentially expressed genes identified by RNA-seq between both RBBP4 and 7 depleted group and control group in mice (ranked by adjusted p (padj) value). Threshold: padj<=0.05 & FoldChange>=1.5 or FoldChange <= -1.5.**

|  | Gene.names | FoldChange | padj |  | Gene.names | FoldChange | padj |
| --- | --- | --- | --- | --- | --- | --- | --- |
| 1 | ***Pomgnt2*** | -20.7783348 | 0.000193 | 225 | ***Pdrg1*** | 1.93224294 | 0.000502 |
| 2 | ***Btbd6*** | -19.2075597 | 0.000350 | 226 | ***Cbs*** | 1.93250053 | 0.003040 |
| 3 | ***Spcs2*** | -17.9086065 | 0.006536 | 227 | ***Gm9864*** | 1.94442719 | 0.000005 |
| 4 | ***Syngap1*** | -16.8890522 | 0.012668 | 228 | ***Tet1*** | 1.94681121 | 0.000018 |
| 5 | ***Rbbp7*** | -12.2007993 | 0.000000 | 229 | ***Mapkapk3*** | 1.96397255 | 0.011296 |
| 6 | ***Zfp934*** | -11.861218 | 0.000312 | 230 | ***Ddx19b*** | 1.98272316 | 0.000033 |
| 7 | ***Gm2541*** | -9.97493391 | 0.017939 | 231 | ***Rap2a*** | 1.99165917 | 0.012468 |
| 8 | ***Rbbp4*** | -9.52235835 | 0.000000 | 232 | ***Lrrn4*** | 1.99337475 | 0.036774 |
| 9 | ***Rps18-ps3*** | -8.63705297 | 0.024221 | 233 | ***C130026I21Rik*** | 2.01380146 | 0.011482 |
| 10 | ***Susd2*** | -7.68881107 | 0.026623 | 234 | ***Cebpa*** | 2.02699238 | 0.032577 |
| 11 | ***Pcbp4*** | -7.45443 | 0.000208 | 235 | ***Zmat3*** | 2.03257153 | 0.000009 |
| 12 | ***Ecm1*** | -7.32609007 | 0.029968 | 236 | ***Cdc42bpg*** | 2.04406334 | 0.000260 |
| 13 | ***Katnal1*** | -7.29934007 | 0.002954 | 237 | ***Hspb1*** | 2.04935775 | 0.005132 |
| 14 | ***Nckipsd*** | -6.45602184 | 0.003467 | 238 | ***Gm10040*** | 2.05545581 | 0.006033 |
| 15 | ***Slc22a23*** | -6.30245674 | 0.000080 | 239 | ***Ankrd10*** | 2.09915854 | 0.036697 |
| 16 | ***Mbd1*** | -6.25287164 | 0.003305 | 240 | ***Cyb5b*** | 2.10330306 | 0.003896 |
| 17 | ***Spata13*** | -6.05837976 | 0.000475 | 241 | ***Serpine2*** | 2.10383913 | 0.036725 |
| 18 | ***Tcf4*** | -5.68695458 | 0.000594 | 242 | ***Slc27a3*** | 2.11542923 | 0.035074 |
| 19 | ***Cacna1h*** | -5.20497448 | 0.006771 | 243 | ***Abhd6*** | 2.12102394 | 0.012409 |
| 20 | ***Irf3*** | -5.19454564 | 0.002224 | 244 | ***Cplane1*** | 2.14974343 | 0.001905 |
| 21 | ***Cpxm1*** | -5.05791298 | 0.000019 | 245 | ***Gata1*** | 2.18054408 | 0.004445 |
| 22 | ***Vtcn1*** | -4.99789092 | 0.000468 | 246 | ***Plekhm2*** | 2.18293808 | 0.010386 |
| 23 | ***Gm28439*** | -4.98187652 | 0.023536 | 247 | ***Trim11*** | 2.19790885 | 0.009481 |
| 24 | ***Ptpn4*** | -4.77949916 | 0.010298 | 248 | ***Cmbl*** | 2.20171121 | 0.036002 |
| 25 | ***Syp*** | -4.76456566 | 0.003477 | 249 | ***Sp110*** | 2.20677774 | 0.003585 |
| 26 | ***Plet1*** | -4.74467588 | 0.000000 | 250 | ***Anapc4*** | 2.21095798 | 0.013906 |
| 27 | ***Dmbx1*** | -4.66900754 | 0.000969 | 251 | ***Plekhg5*** | 2.21947242 | 0.013409 |
| 28 | ***Lars2*** | -4.42282005 | 0.004763 | 252 | ***Ctc1*** | 2.25785116 | 0.000671 |
| 29 | ***Dok1*** | -4.3707729 | 0.000019 | 253 | ***Rev1*** | 2.28167306 | 0.016077 |
| 30 | ***Pik3cd*** | -4.29939265 | 0.000620 | 254 | ***Efna3*** | 2.29854167 | 0.002815 |
| 31 | ***Eif4a-ps4*** | -4.22506569 | 0.004621 | 255 | ***Ccp110*** | 2.29885576 | 0.018385 |
| 32 | ***Id2*** | -4.21286975 | 0.000008 | 256 | ***Btbd18*** | 2.30387279 | 0.000170 |
| 33 | ***Tat*** | -4.19099987 | 0.000000 | 257 | ***Ppp3ca*** | 2.30528977 | 0.006795 |
| 34 | ***Glrx*** | -4.01346908 | 0.002007 | 258 | ***Ptprs*** | 2.3151558 | 0.029994 |
| 35 | ***Kcnab2*** | -3.95229843 | 0.023701 | 259 | ***Tbc1d8*** | 2.35986365 | 0.016362 |
| 36 | ***Wdr47*** | -3.89064727 | 0.000475 | 260 | ***Plk2*** | 2.36940656 | 0.000609 |
| 37 | ***Fhod1*** | -3.79047368 | 0.040640 | 261 | ***Gm38393*** | 2.38436577 | 0.013906 |
| 38 | ***Tmem131l*** | -3.75182538 | 0.030029 | 262 | ***Wnk3*** | 2.39872921 | 0.002258 |
| 39 | ***Kdelr1*** | -3.71954361 | 0.000007 | 263 | ***H1f0*** | 2.39940002 | 0.016555 |
| 40 | ***Hnrnpc*** | -3.54593397 | 0.000000 | 264 | ***Tsen2*** | 2.39965857 | 0.033675 |
| 41 | ***F2rl1*** | -3.49114586 | 0.016673 | 265 | ***H3f3b*** | 2.41682539 | 0.000000 |
| 42 | ***Pak6*** | -3.43949459 | 0.025526 | 266 | ***Cep250*** | 2.42181633 | 0.013578 |
| 43 | ***Fbxo3*** | -3.42560321 | 0.000033 | 267 | ***Csrnp2*** | 2.42348133 | 0.013987 |
| 44 | ***Cdc42ep1*** | -3.41960309 | 0.000257 | 268 | ***Ddit4*** | 2.42434522 | 0.000124 |
| 45 | ***Kif21b*** | -3.40038205 | 0.022252 | 269 | ***Neto2*** | 2.42483228 | 0.036222 |
| 46 | ***Erbb2*** | -3.34390478 | 0.000005 | 270 | ***Ddhd1*** | 2.43188107 | 0.000170 |
| 47 | ***Mfn2*** | -3.33440044 | 0.000000 | 271 | ***2010300C02Rik*** | 2.43630939 | 0.023701 |
| 48 | ***Txndc16*** | -3.31784456 | 0.034999 | 272 | ***Tubb6*** | 2.46489207 | 0.000208 |
| 49 | ***Mfsd13a*** | -3.28929329 | 0.001283 | 273 | ***Tchp*** | 2.47062086 | 0.011963 |
| 50 | ***Flot1*** | -3.25888802 | 0.043173 | 274 | ***Pmaip1*** | 2.48570017 | 0.000007 |
| 51 | ***Nr4a1*** | -3.25122477 | 0.001754 | 275 | ***AC132444.1*** | 2.48771838 | 0.006795 |
| 52 | ***E2f2*** | -3.23609754 | 0.000475 | 276 | ***Ddr2*** | 2.49469036 | 0.040640 |
| 53 | ***Lrfn1*** | -3.1999459 | 0.003896 | 277 | ***Tdpoz2*** | 2.50163807 | 0.005411 |
| 54 | ***Znrd1*** | -3.199789 | 0.000370 | 278 | ***Ptpn21*** | 2.50623697 | 0.004445 |
| 55 | ***Igsf3*** | -3.19875066 | 0.001122 | 279 | ***Def6*** | 2.52416407 | 0.026727 |
| 56 | ***Tbc1d2b*** | -3.10364818 | 0.036983 | 280 | ***Cry1*** | 2.5447563 | 0.000002 |
| 57 | ***Mmachc*** | -3.09034607 | 0.014356 | 281 | ***Rdh10*** | 2.54739601 | 0.000170 |
| 58 | ***Bloc1s5*** | -2.96103292 | 0.042573 | 282 | ***Cbx7*** | 2.54935621 | 0.003896 |
| 59 | ***Tmem254b*** | -2.92250623 | 0.005786 | 283 | ***Ergic1*** | 2.59330121 | 0.010959 |
| 60 | ***Atp1b1*** | -2.9155029 | 0.000000 | 284 | ***Nkx6-2*** | 2.60583293 | 0.001997 |
| 61 | ***Mpzl2*** | -2.84708289 | 0.000050 | 285 | ***Slc22a13b*** | 2.6085633 | 0.023908 |
| 62 | ***Pank3*** | -2.83415604 | 0.000000 | 286 | ***Mgarp*** | 2.61370903 | 0.000333 |
| 63 | ***Vangl1*** | -2.80678882 | 0.013272 | 287 | ***Hectd4*** | 2.61831402 | 0.000033 |
| 64 | ***Krt18*** | -2.79975725 | 0.000008 | 288 | ***Inppl1*** | 2.6285218 | 0.000041 |
| 65 | ***Pik3c2a*** | -2.79639624 | 0.000762 | 289 | ***Btg2*** | 2.63788473 | 0.000295 |
| 66 | ***Tmem106b*** | -2.79331672 | 0.041453 | 290 | ***Rab31*** | 2.64500281 | 0.013066 |
| 67 | ***Dtd2*** | -2.78579406 | 0.022002 | 291 | ***Gadd45b*** | 2.65907788 | 0.026623 |
| 68 | ***Ankrd50*** | -2.76187711 | 0.028565 | 292 | ***Tctn1*** | 2.68823517 | 0.020971 |
| 69 | ***Fmnl3*** | -2.71536522 | 0.005984 | 293 | ***Foxe1*** | 2.70522208 | 0.005786 |
| 70 | ***Lin37*** | -2.71437152 | 0.014356 | 294 | ***BC021767*** | 2.71221833 | 0.005307 |
| 71 | ***Tubb5*** | -2.71233725 | 0.007908 | 295 | ***E030030I06Rik*** | 2.72640243 | 0.006250 |
| 72 | ***Sac3d1*** | -2.70626918 | 0.006113 | 296 | ***Pcyox1*** | 2.73425037 | 0.001856 |
| 73 | ***Zfp57*** | -2.69871 | 0.034416 | 297 | ***Spred3*** | 2.73661492 | 0.027376 |
| 74 | ***Mtm1*** | -2.69000753 | 0.033639 | 298 | ***Micall1*** | 2.76350318 | 0.002831 |
| 75 | ***Zfp367*** | -2.68670527 | 0.000221 | 299 | ***Zfp326*** | 2.78010198 | 0.006219 |
| 76 | ***2610001J05Rik*** | -2.67135376 | 0.013385 | 300 | ***Akap9*** | 2.79785039 | 0.041299 |
| 77 | ***Smpd1*** | -2.66386942 | 0.000000 | 301 | ***Tmem229b*** | 2.81908688 | 0.028907 |
| 78 | ***Hmgn5*** | -2.66149956 | 0.000104 | 302 | ***Hormad1*** | 2.82372757 | 0.026623 |
| 79 | ***Ptpn3*** | -2.65194521 | 0.000076 | 303 | ***Ina*** | 2.88575329 | 0.012103 |
| 80 | ***Ckap2l*** | -2.59487877 | 0.002118 | 304 | ***Slc25a42*** | 2.89070296 | 0.002428 |
| 81 | ***Ugp2*** | -2.58582393 | 0.000170 | 305 | ***Gm14401*** | 2.91338268 | 0.026623 |
| 82 | ***Naga*** | -2.57095322 | 0.002388 | 306 | ***Ddit4l*** | 3.010798 | 0.000065 |
| 83 | ***Pafah1b2*** | -2.54365102 | 0.000000 | 307 | ***Slc16a6*** | 3.02132448 | 0.000008 |
| 84 | ***Plk3*** | -2.51950323 | 0.009537 | 308 | ***Lrp1*** | 3.02521593 | 0.010874 |
| 85 | ***Fabp3*** | -2.50822624 | 0.000000 | 309 | ***Qpctl*** | 3.03573476 | 0.010509 |
| 86 | ***Kpna2*** | -2.49986966 | 0.000000 | 310 | ***S1pr2*** | 3.03721389 | 0.004749 |
| 87 | ***Dab2ip*** | -2.48691805 | 0.000161 | 311 | ***Dcbld2*** | 3.04777762 | 0.000000 |
| 88 | ***Serpinb9b*** | -2.47949391 | 0.000026 | 312 | ***Ak1*** | 3.05230838 | 0.018852 |
| 89 | ***Prss8*** | -2.47303969 | 0.010505 | 313 | ***Snrk*** | 3.06729272 | 0.009550 |
| 90 | ***Cdca3*** | -2.43850898 | 0.000002 | 314 | ***Epm2aip1*** | 3.09342315 | 0.000010 |
| 91 | ***Efhd2*** | -2.42702836 | 0.000475 | 315 | ***Evi5l*** | 3.10058578 | 0.043077 |
| 92 | ***Lmna*** | -2.41378235 | 0.000316 | 316 | ***Rnf169*** | 3.12406045 | 0.002893 |
| 93 | ***Mob1a*** | -2.40997734 | 0.000000 | 317 | ***Lgals9*** | 3.14305452 | 0.024626 |
| 94 | ***Kif16b*** | -2.39059906 | 0.000651 | 318 | ***Ptpn14*** | 3.22849468 | 0.003390 |
| 95 | ***Nelfb*** | -2.38967616 | 0.005043 | 319 | ***Col9a2*** | 3.23675648 | 0.000000 |
| 96 | ***Cep55*** | -2.37760168 | 0.023536 | 320 | ***Thyn1*** | 3.2647806 | 0.005536 |
| 97 | ***St6galnac2*** | -2.37450001 | 0.000193 | 321 | ***Nectin4*** | 3.26494939 | 0.022565 |
| 98 | ***Nusap1*** | -2.37152223 | 0.033037 | 322 | ***Slc37a2*** | 3.27620949 | 0.000370 |
| 99 | ***Usp16*** | -2.3492201 | 0.000015 | 323 | ***Nefh*** | 3.29121656 | 0.016537 |
| 100 | ***Lama3*** | -2.33457335 | 0.020164 | 324 | ***Cdh3*** | 3.30855249 | 0.003768 |
| 101 | ***Zfp180*** | -2.30816697 | 0.027661 | 325 | ***P2rx7*** | 3.30886548 | 0.000178 |
| 102 | ***Pif1*** | -2.2946626 | 0.044253 | 326 | ***Zhx3*** | 3.31261762 | 0.005411 |
| 103 | ***Dsg2*** | -2.29365924 | 0.041299 | 327 | ***Gm4779*** | 3.3152004 | 0.005373 |
| 104 | ***Tmem79*** | -2.28053353 | 0.032628 | 328 | ***Cpne1*** | 3.32459929 | 0.002224 |
| 105 | ***Trp53bp2*** | -2.27396955 | 0.000002 | 329 | ***Col5a3*** | 3.35917781 | 0.002793 |
| 106 | ***Dlg3*** | -2.25917659 | 0.035393 | 330 | ***Parp12*** | 3.37381287 | 0.036776 |
| 107 | ***Myo18a*** | -2.25906694 | 0.035393 | 331 | ***Slc44a2*** | 3.3763413 | 0.006121 |
| 108 | ***Wdr1*** | -2.25117327 | 0.000475 | 332 | ***Agpat4*** | 3.37983328 | 0.032628 |
| 109 | ***Prr11*** | -2.24936925 | 0.008685 | 333 | ***Pgap1*** | 3.38390372 | 0.000003 |
| 110 | ***Casc4*** | -2.24223838 | 0.041453 | 334 | ***Map3k20*** | 3.40461913 | 0.001468 |
| 111 | ***Ncapd2*** | -2.23772026 | 0.000026 | 335 | ***Cobll1*** | 3.42155831 | 0.000908 |
| 112 | ***Pdcd4*** | -2.20389172 | 0.039065 | 336 | ***Ube2r2*** | 3.4286652 | 0.000906 |
| 113 | ***Ptprn*** | -2.18638697 | 0.016083 | 337 | ***Itgb4*** | 3.46080592 | 0.009085 |
| 114 | ***Enpep*** | -2.17572868 | 0.000028 | 338 | ***Pramef17*** | 3.47140035 | 0.006671 |
| 115 | ***Clic4*** | -2.16638365 | 0.000001 | 339 | ***Hspa1b*** | 3.47521578 | 0.000370 |
| 116 | ***Gtpbp1*** | -2.12997606 | 0.012007 | 340 | ***Nsmaf*** | 3.47611275 | 0.000000 |
| 117 | ***Tinagl1*** | -2.12631794 | 0.005455 | 341 | ***Prx*** | 3.49641987 | 0.040640 |
| 118 | ***Ppp1ccb*** | -2.1031986 | 0.015957 | 342 | ***Tmem63a*** | 3.50212056 | 0.037805 |
| 119 | ***Cdx2*** | -2.09968928 | 0.005786 | 343 | ***Syt11*** | 3.5997837 | 0.022002 |
| 120 | ***Mki67*** | -2.09315668 | 0.001304 | 344 | ***Adap1*** | 3.62219463 | 0.003278 |
| 121 | ***Tanc1*** | -2.08755268 | 0.010760 | 345 | ***Gm5662*** | 3.63113518 | 0.011630 |
| 122 | ***Itga5*** | -2.08321353 | 0.044796 | 346 | ***Serinc5*** | 3.63799477 | 0.000161 |
| 123 | ***Max*** | -2.06917403 | 0.000031 | 347 | ***Mettl7a3*** | 3.65042188 | 0.018145 |
| 124 | ***Nkiras2*** | -2.04041011 | 0.009268 | 348 | ***H1f10*** | 3.65457595 | 0.034241 |
| 125 | ***Tmem254c*** | -2.03229263 | 0.014452 | 349 | ***Azin2*** | 3.65505247 | 0.020121 |
| 126 | ***Cyb5r3*** | -2.02776085 | 0.003014 | 350 | ***AC125149.3*** | 3.66874564 | 0.000002 |
| 127 | ***Mtf2*** | -2.02614442 | 0.000000 | 351 | ***Sycp1*** | 3.68572145 | 0.000620 |
| 128 | ***Gabarap*** | -1.99237693 | 0.005786 | 352 | ***Cercam*** | 3.7008603 | 0.040016 |
| 129 | ***Taf6l*** | -1.98814697 | 0.041299 | 353 | ***B3gntl1*** | 3.70265173 | 0.009500 |
| 130 | ***Slc35f6*** | -1.96869803 | 0.023621 | 354 | ***Arrdc3*** | 3.74590596 | 0.000021 |
| 131 | ***Smc6*** | -1.94702746 | 0.006795 | 355 | ***Mrgprc2-ps*** | 3.77399489 | 0.005132 |
| 132 | ***Smtn*** | -1.93773149 | 0.033675 | 356 | ***Cd81*** | 3.78932659 | 0.000057 |
| 133 | ***Nynrin*** | -1.93490412 | 0.007678 | 357 | ***Hpcal1*** | 3.80819453 | 0.002815 |
| 134 | ***Akr1b8*** | -1.92755881 | 0.020553 | 358 | ***Sec1*** | 3.82899048 | 0.000000 |
| 135 | ***Mtmr4*** | -1.91623472 | 0.002810 | 359 | ***Pcnt*** | 3.84065033 | 0.001163 |
| 136 | ***Ube2m*** | -1.90490799 | 0.000076 | 360 | ***H2bc4*** | 3.87529959 | 0.047525 |
| 137 | ***Chfr*** | -1.89706091 | 0.036776 | 361 | ***Gm12183*** | 3.95101947 | 0.018852 |
| 138 | ***Csf3r*** | -1.89458848 | 0.000802 | 362 | ***Kctd15*** | 3.99868323 | 0.036776 |
| 139 | ***Zc3h3*** | -1.89161915 | 0.023621 | 363 | ***Fhl2*** | 4.04697325 | 0.027311 |
| 140 | ***Shroom3*** | -1.83965585 | 0.034369 | 364 | ***Klrg2*** | 4.07182514 | 0.000539 |
| 141 | ***Ptges*** | -1.83145072 | 0.000030 | 365 | ***Gm28036*** | 4.07482622 | 0.001311 |
| 142 | ***Prkcsh*** | -1.82702924 | 0.003896 | 366 | ***Srl*** | 4.07636621 | 0.002101 |
| 143 | ***Arid3b*** | -1.82554074 | 0.039797 | 367 | ***Ciita*** | 4.07900923 | 0.002037 |
| 144 | ***Rnf185*** | -1.82455698 | 0.020900 | 368 | ***H2aw*** | 4.08919196 | 0.001849 |
| 145 | ***Vps50*** | -1.82289395 | 0.010095 | 369 | ***Klhdc7a*** | 4.11290102 | 0.000000 |
| 146 | ***Gab1*** | -1.81417637 | 0.005263 | 370 | ***Bglap3*** | 4.13303887 | 0.000001 |
| 147 | ***Patl1*** | -1.81387209 | 0.011482 | 371 | ***Acad10*** | 4.14068008 | 0.000005 |
| 148 | ***Acadvl*** | -1.79769781 | 0.013359 | 372 | ***Gm13988*** | 4.16975388 | 0.000001 |
| 149 | ***Mis12*** | -1.79348853 | 0.030203 | 373 | ***Ldha*** | 4.17606089 | 0.000000 |
| 150 | ***Pxk*** | -1.79181431 | 0.041998 | 374 | ***Taok3*** | 4.17660771 | 0.007041 |
| 151 | ***Pttg1*** | -1.78655341 | 0.013110 | 375 | ***4933427I04Rik*** | 4.23207693 | 0.000000 |
| 152 | ***Lmo7*** | -1.74425333 | 0.036776 | 376 | ***Hspa1a*** | 4.26455252 | 0.003164 |
| 153 | ***Klf6*** | -1.72881061 | 0.011536 | 377 | ***Gdpd1*** | 4.38162795 | 0.018756 |
| 154 | ***Ppp1r11*** | -1.71912217 | 0.034137 | 378 | ***Limch1*** | 4.39448362 | 0.023618 |
| 155 | ***Zc3h7a*** | -1.71004222 | 0.023701 | 379 | ***Cd209c*** | 4.50179724 | 0.000000 |
| 156 | ***Agpat2*** | -1.70928374 | 0.007434 | 380 | ***Tex15*** | 4.52118687 | 0.010874 |
| 157 | ***Ttll12*** | -1.69727791 | 0.004445 | 381 | ***Uchl1*** | 4.56470836 | 0.000000 |
| 158 | ***Vac14*** | -1.69364045 | 0.036697 | 382 | ***Nfam1*** | 4.60338499 | 0.003454 |
| 159 | ***Racgap1*** | -1.6905866 | 0.021843 | 383 | ***Gm11331*** | 4.61081417 | 0.000000 |
| 160 | ***Osbpl7*** | -1.68721863 | 0.027993 | 384 | ***Dusp1*** | 4.64101791 | 0.000001 |
| 161 | ***Depdc7*** | -1.68630504 | 0.028083 | 385 | ***Rgn*** | 4.65728807 | 0.019100 |
| 162 | ***9530068E07Rik*** | -1.6764872 | 0.043173 | 386 | ***H60b*** | 4.66160458 | 0.000370 |
| 163 | ***Strip1*** | -1.66622677 | 0.030286 | 387 | ***Cd1d1*** | 4.66174217 | 0.000553 |
| 164 | ***Net1*** | -1.66342364 | 0.006527 | 388 | ***S100a6*** | 4.69654354 | 0.023618 |
| 165 | ***Dusp4*** | -1.66200208 | 0.016537 | 389 | ***Plekhg1*** | 4.71289638 | 0.049851 |
| 166 | ***Ptpn12*** | -1.65998641 | 0.011885 | 390 | ***Tuba3a*** | 4.75308334 | 0.011081 |
| 167 | ***Tollip*** | -1.65076648 | 0.002831 | 391 | ***Foxb2*** | 4.76129865 | 0.005132 |
| 168 | ***Stard10*** | -1.64221086 | 0.000584 | 392 | ***Prr18*** | 4.78976713 | 0.022473 |
| 169 | ***Ctdspl2*** | -1.63157472 | 0.005819 | 393 | ***Fbxo10*** | 4.79475619 | 0.043199 |
| 170 | ***Bmyc*** | -1.62291885 | 0.011760 | 394 | ***H2-Eb1*** | 4.79752302 | 0.002246 |
| 171 | ***Dap*** | -1.61310682 | 0.004476 | 395 | ***Rhov*** | 4.90935451 | 0.000403 |
| 172 | ***Dlc1*** | -1.61262302 | 0.034308 | 396 | ***Plek2*** | 4.91713317 | 0.005164 |
| 173 | ***Fbxo5*** | -1.60739502 | 0.025204 | 397 | ***Mtcl1*** | 4.96341938 | 0.016553 |
| 174 | ***Trim28*** | -1.60415949 | 0.000000 | 398 | ***Wipi1*** | 4.98284934 | 0.015957 |
| 175 | ***Mt2*** | -1.5942789 | 0.001856 | 399 | ***Tef*** | 5.12896337 | 0.000000 |
| 176 | ***St6galnac4*** | -1.58815077 | 0.037805 | 400 | ***Vav1*** | 5.14445417 | 0.000001 |
| 177 | ***Palm3*** | -1.58503968 | 0.038396 | 401 | ***Rasa4*** | 5.18642656 | 0.000047 |
| 178 | ***Tmem231*** | -1.58298781 | 0.004081 | 402 | ***Twsg1*** | 5.24456956 | 0.000185 |
| 179 | ***Osbpl8*** | -1.5791924 | 0.006593 | 403 | ***Eng*** | 5.28436297 | 0.000000 |
| 180 | ***Surf4*** | -1.57822771 | 0.005786 | 404 | ***Lmod3*** | 5.28987181 | 0.023932 |
| 181 | ***Cenpa*** | -1.57631757 | 0.020664 | 405 | ***Ccdc125*** | 5.31000747 | 0.042856 |
| 182 | ***Kpna3*** | -1.57349153 | 0.011626 | 406 | ***Plau*** | 5.3105284 | 0.000000 |
| 183 | ***Vps26a*** | -1.57117602 | 0.002810 | 407 | ***Foxl2*** | 5.51015316 | 0.038779 |
| 184 | ***Srrt*** | -1.56452235 | 0.022830 | 408 | ***Pgbd5*** | 5.53741136 | 0.004749 |
| 185 | ***Krt8*** | -1.56173569 | 0.014979 | 409 | ***Oas1e*** | 5.53983877 | 0.000015 |
| 186 | ***Ptbp3*** | -1.55896765 | 0.002376 | 410 | ***Stox1*** | 5.58732543 | 0.027311 |
| 187 | ***Mef2d*** | -1.55604896 | 0.011296 | 411 | ***Gpx3*** | 5.6034883 | 0.017253 |
| 188 | ***Rnf213*** | -1.55493279 | 0.002212 | 412 | ***Sox9*** | 5.65447335 | 0.000007 |
| 189 | ***Btrc*** | -1.54831566 | 0.000078 | 413 | ***Robo3*** | 5.66268635 | 0.017506 |
| 190 | ***Ripor1*** | -1.53564143 | 0.025577 | 414 | ***Hbs1l*** | 5.72044444 | 0.040115 |
| 191 | ***Kank2*** | 1.51847623 | 0.025239 | 415 | ***Eif4e1b*** | 5.74203697 | 0.000010 |
| 192 | ***Tmem63b*** | 1.54570703 | 0.035741 | 416 | ***Tmc7*** | 5.76309554 | 0.033675 |
| 193 | ***Man2b1*** | 1.57555436 | 0.037805 | 417 | ***Il34*** | 5.83925948 | 0.017373 |
| 194 | ***Stard4*** | 1.5763815 | 0.002058 | 418 | ***Synm*** | 6.00513511 | 0.000423 |
| 195 | ***Timm29*** | 1.60361201 | 0.040161 | 419 | ***Bbs7*** | 6.02309765 | 0.000008 |
| 196 | ***Sirt1*** | 1.6043537 | 0.002723 | 420 | ***Foxq1*** | 6.12685042 | 0.047602 |
| 197 | ***Mdm2*** | 1.61031631 | 0.000685 | 421 | ***Slc4a8*** | 6.14678348 | 0.000072 |
| 198 | ***Slc66a2*** | 1.61386611 | 0.023618 | 422 | ***Trim7*** | 6.1502463 | 0.001736 |
| 199 | ***Fdft1*** | 1.62479404 | 0.014402 | 423 | ***Sema6a*** | 6.1624148 | 0.000769 |
| 200 | ***Ric1*** | 1.62518782 | 0.036776 | 424 | ***Txnip*** | 6.16755946 | 0.018892 |
| 201 | ***Dhx32*** | 1.64766927 | 0.007718 | 425 | ***Ptafr*** | 6.18849072 | 0.028565 |
| 202 | ***Cadm1*** | 1.6553278 | 0.014903 | 426 | ***Pnma2*** | 6.21314343 | 0.001036 |
| 203 | ***Nin*** | 1.66736196 | 0.017555 | 427 | ***Mgl2*** | 6.29813999 | 0.000001 |
| 204 | ***Acad11*** | 1.67909196 | 0.027933 | 428 | ***Garnl3*** | 6.33858737 | 0.013279 |
| 205 | ***Vav2*** | 1.72587592 | 0.005278 | 429 | ***BC051019*** | 6.82571542 | 0.000000 |
| 206 | ***Wdr35*** | 1.72629146 | 0.018949 | 430 | ***Sall3*** | 6.88282377 | 0.006016 |
| 207 | ***Myo9b*** | 1.72821999 | 0.017024 | 431 | ***Dop1b*** | 6.9955999 | 0.037805 |
| 208 | ***Smcr8*** | 1.73015862 | 0.009700 | 432 | ***Cdhr2*** | 7.11228903 | 0.000137 |
| 209 | ***Ccdc117*** | 1.73323542 | 0.000196 | 433 | ***Klrb1a*** | 7.21229102 | 0.028565 |
| 210 | ***Zfp239*** | 1.73405942 | 0.023932 | 434 | ***Tekt2*** | 7.32568282 | 0.041299 |
| 211 | ***Rbsn*** | 1.75601834 | 0.012616 | 435 | ***Peg10*** | 7.53443929 | 0.005094 |
| 212 | ***Trp53bp1*** | 1.7631879 | 0.023273 | 436 | ***Acvrl1*** | 8.08506545 | 0.020869 |
| 213 | ***Ryr1*** | 1.76425522 | 0.010959 | 437 | ***Adcy5*** | 8.14108578 | 0.000026 |
| 214 | ***Psg16*** | 1.77995647 | 0.004168 | 438 | ***Krt19*** | 8.85540902 | 0.000000 |
| 215 | ***AA467197*** | 1.79013578 | 0.013066 | 439 | ***Csnk2a3*** | 9.84790008 | 0.000294 |
| 216 | ***Rbm38*** | 1.82882873 | 0.010874 | 440 | ***Gabrr1*** | 10.7204597 | 0.032628 |
| 217 | ***Ing1*** | 1.8456153 | 0.032577 | 441 | ***Elovl3*** | 13.4286338 | 0.000000 |
| 218 | ***Urm1*** | 1.84733961 | 0.012329 | 442 | ***Arhgap33*** | 18.2747841 | 0.008108 |
| 219 | ***Cdc7*** | 1.85895242 | 0.017129 | 443 | ***Vcan*** | 18.3132705 | 0.006677 |
| 220 | ***Resf1*** | 1.88145306 | 0.001856 | 444 | ***Cd247*** | 19.3238317 | 0.002237 |
| 221 | ***Phlda3*** | 1.91990025 | 0.003503 | 445 | ***Tusc3*** | 22.0708717 | 0.000350 |
| 222 | ***Cth*** | 1.92579998 | 0.000741 | 446 | ***Gm12613*** | 24.3199762 | 0.000001 |
| 223 | ***Klhl22*** | 1.92663738 | 0.039065 | 447 | ***Rsc1a1*** | 47.793453 | 0.006881 |
| 224 | ***I0C0044D17Rik*** | 1.92766068 | 0.038255 |  |  |  |  |
